# Supplementary material for: Identification and Functional Analysis of Long Non-coding RNAs in Autism Spectrum Disorders
Source: Front Genet. 2020 Sep 16;11:849. doi: 10.3389/fgene.2020.00849 (PMC7525012; doi:10.3389/fgene.2020.00849)
Supplement: Supplementary file 1 [file Data_Sheet_1.xlsx]

## Sheet: Table S1
Supplementary Table 1. List of autism spectrum disorder (ASD)-related lncRNAs
Gene stable ID	Chromosome/scaffold name	Gene start (bp)	Gene end (bp)	Strand	Gene type	Gene name	Type of ASD-related genomic variants
ENSG00000236744	10	55247755	55597233	-1	sense_intronic	AC016822.1	SNV,CNV,INDEL
ENSG00000251314	5	95962001	96631085	1	antisense	AC104123.1	SNV,CNV,INDEL
ENSG00000249738	5	159310745	159805536	1	antisense	AC008691.1	SNV,CNV,INDEL
ENSG00000253939	8	39903775	39995248	-1	antisense	AC007991.3	SNV,CNV,INDEL
ENSG00000254226	5	151949571	152270448	1	lincRNA	LINC01933	SNV,CNV,INDEL
ENSG00000259200	15	45705078	45931069	1	lincRNA	AC068722.1	SNV,CNV,INDEL
ENSG00000285219	6	8435568	9294133	1	bidirectional_promoter_lncRNA	AL591485.1	SNV,CNV,INDEL
ENSG00000236922	4	117406166	117691188	1	lincRNA	LINC01378	SNV,CNV
ENSG00000226026	1	95163219	95233982	-1	antisense	AC092802.1	SNV,CNV
ENSG00000261273	16	88234785	88302511	1	lincRNA	AC138512.1	SNV,CNV
ENSG00000235823	10	100373513	100454043	1	lincRNA	OLMALINC	SNV,CNV
ENSG00000261621	15	24235078	24276829	1	lincRNA	AC087463.4	SNV,CNV
ENSG00000285575	18	5197165	5215497	1	antisense	AP001496.4	SNV,CNV
ENSG00000249867	11	28702615	29063821	1	lincRNA	AC090833.1	SNV,CNV
ENSG00000285961	6	92002610	92180156	-1	lincRNA	AL590814.1	SNV,CNV
ENSG00000285557	3	148368384	148591927	-1	lincRNA	AC069410.1	SNV,CNV
ENSG00000284418	9	22703516	23438700	-1	lincRNA	AL391117.1	SNV,CNV
ENSG00000233358	6	22744395	23031780	-1	lincRNA	AL035401.1	SNV,CNV
ENSG00000265994	18	28638714	28789580	1	lincRNA	AC090365.1	SNV,CNV
ENSG00000246090	4	99088857	99301356	1	antisense	AP002026.1	SNV,CNV
ENSG00000280993	CHR_HSCHR3_3_CTG3	195658062	195776180	1	lincRNA	MUC20-OT1	SNV,INDEL
ENSG00000203721	1	200253419	200400705	-1	lincRNA	LINC00862	SNV,INDEL
ENSG00000229970	7	8262264	8344516	1	antisense	AC007128.1	SNV,INDEL
ENSG00000285580	9	64343044	64362584	1	lincRNA	CR769776.3	SNV,INDEL
ENSG00000228436	1	38860000	38919396	1	antisense	AL139260.1	SNV,INDEL
ENSG00000277215	X	141502849	141649927	1	lincRNA	SPANXA2-OT1	SNV,INDEL
ENSG00000281048	CHR_HSCHR5_2_CTG5	177954877	177967034	1	antisense	AC114936.2	SNV,INDEL
ENSG00000280944	CHR_HSCHR2_1_CTG7	90365762	90367722	1	lincRNA	AC241851.2	SNV,INDEL
ENSG00000283000	10	34969909	34975578	1	lincRNA	AL392046.2	SNV,INDEL
ENSG00000236373	10	90402521	90540805	-1	lincRNA	AL391704.2	SNV,INDEL
ENSG00000242641	3	84638406	84881679	-1	lincRNA	LINC00971	SNV,INDEL
ENSG00000278811	1	147258885	147517875	-1	antisense	LINC00624	SNV,INDEL
ENSG00000275649	9	42231811	42354454	1	lincRNA	AL445584.2	SNV,INDEL
ENSG00000234394	9	68306528	68330626	1	lincRNA	AL353608.3	SNV,INDEL
ENSG00000259705	15	48645951	48652016	1	lincRNA	AC084757.3	SNV,INDEL
ENSG00000281367	CHR_HSCHR11_1_CTG5	7861399	7916588	-1	lincRNA	AC044810.5	SNV,INDEL
ENSG00000224970	7	142875836	142892743	1	antisense	AC245427.1	SNV,INDEL
ENSG00000279516	13	18195297	18232024	1	lincRNA	FAM230C	SNV,INDEL
ENSG00000278932	21	9325013	9368775	1	lincRNA	CR381653.1	SNV,INDEL
ENSG00000226067	1	120913275	121009291	1	lincRNA	LINC00623	SNV,INDEL
ENSG00000234323	9	105993310	106740875	1	lincRNA	LINC01505	SNV,INDEL
ENSG00000225206	1	97933474	98049863	-1	lincRNA	MIR137HG	SNV,INDEL
ENSG00000279669	21	5232668	5243833	-1	lincRNA	AC079801.1	SNV,INDEL
ENSG00000260141	16	33043609	33095431	-1	lincRNA	AC145350.2	SNV,INDEL
ENSG00000248373	4	104907357	105120000	1	lincRNA	AC096577.1	SNV,INDEL
ENSG00000241163	3	72035300	72279503	-1	lincRNA	LINC00877	SNV,INDEL
ENSG00000224739	2	43001355	43006060	-1	lincRNA	AC016735.1	SNV,INDEL
ENSG00000226571	6	139271362	139667284	1	antisense	AL592429.2	SNV,INDEL
ENSG00000237153	9	16917511	17114122	1	lincRNA	AL162725.2	SNV,INDEL
ENSG00000224186	5	135033280	135358219	1	antisense	C5orf66	SNV,INDEL
ENSG00000232633	5	113323028	113437174	1	antisense	AC079465.1	SNV,INDEL
ENSG00000281081	CHR_HSCHR5_2_CTG5	177944158	177987099	1	lincRNA	AC114936.3	SNV,INDEL
ENSG00000232461	3	176643941	176867838	-1	lincRNA	AC092920.1	SNV,INDEL
ENSG00000283554	13	42339188	42485956	1	lincRNA	LINC02341	CNV,INDEL
ENSG00000226328	22	45133020	45163781	-1	lincRNA	NUP50-DT	CNV,INDEL
ENSG00000249937	5	17684584	17955857	1	lincRNA	LINC02223	CNV,INDEL
ENSG00000250137	4	23560923	23768652	1	antisense	AC093607.1	CNV,INDEL
ENSG00000223783	3	195836193	195860404	-1	lincRNA	LINC01983	CNV,INDEL
ENSG00000257261	12	46383679	46876159	1	lincRNA	AC008014.1	CNV,INDEL
ENSG00000241743	X	113616300	114059289	-1	lincRNA	XACT	CNV,INDEL
ENSG00000227172	7	39545646	39566239	-1	antisense	AC011290.1	CNV,INDEL
ENSG00000248118	5	3417152	3536094	-1	lincRNA	LINC01019	CNV,INDEL
ENSG00000228412	6	19324988	19839080	-1	antisense	AL022068.1	CNV,INDEL
ENSG00000245275	5	154329437	154445850	-1	antisense	SAP30L-AS1	CNV,INDEL
ENSG00000248515	4	19455436	19909692	1	lincRNA	AC024230.1	CNV,INDEL
ENSG00000255041	11	45387215	45513802	-1	lincRNA	AC103855.3	CNV,INDEL
ENSG00000259345	15	38865322	39427195	-1	lincRNA	AC013652.1	CNV,INDEL
ENSG00000233128	2	40746487	40767452	1	lincRNA	LINC01794	CNV,INDEL
ENSG00000250432	12	54085132	54125992	-1	lincRNA	FAM242C	SNV
ENSG00000253893	8	8167819	8226614	-1	antisense	FAM85B	SNV
ENSG00000285517	12	30795458	30879268	1	lincRNA	AC010198.2	SNV
ENSG00000260213	16	81016792	81035759	-1	antisense	AC092718.2	SNV
ENSG00000282721	CHR_HSCHR17_7_CTG4	36073222	36090476	1	antisense	AC069363.3	SNV
ENSG00000236303	10	130213488	130483193	1	lincRNA	AL157712.1	SNV
ENSG00000267586	18	42159283	42691422	1	lincRNA	LINC00907	SNV
ENSG00000267643	18	12200779	12201979	1	lincRNA	AP005264.4	SNV
ENSG00000279973	22	11066418	11068174	1	lincRNA	CU104787.1	SNV
ENSG00000226445	6	169213254	169239565	1	antisense	BX322234.1	SNV
ENSG00000235277	21	14918534	14947096	1	antisense	AF127577.3	SNV
ENSG00000229876	20	6446723	6528459	1	lincRNA	CASC20	SNV
ENSG00000267026	9	98847172	98872415	-1	antisense	AL136084.2	SNV
ENSG00000267761	18	47285725	47594550	1	lincRNA	MIR4527HG	SNV
ENSG00000197210	22	21114607	21124451	-1	lincRNA	AP000550.1	SNV
ENSG00000260423	12	9367464	9397617	1	lincRNA	LINC02367	SNV
ENSG00000281261	CHR_HSCHR11_2_CTG1_1	1663142	1665432	1	lincRNA	FAM99A	SNV
ENSG00000263916	18	49484536	49486149	-1	sense_intronic	AC100778.2	SNV
ENSG00000260923	16	90173217	90222678	1	lincRNA	LINC02193	SNV
ENSG00000269994	9	87008455	87042126	-1	lincRNA	AL513318.2	SNV
ENSG00000253613	5	111076921	111092115	-1	antisense	AC008572.1	SNV
ENSG00000214184	2	108507515	108534196	-1	antisense	GCC2-AS1	SNV
ENSG00000236021	1	176207648	176229330	1	antisense	AL359265.3	SNV
ENSG00000282355	CHR_HSCHR11_1_CTG7	3027879	3040098	1	antisense	CARS-AS1	SNV
ENSG00000274827	14	19344578	19384587	-1	lincRNA	LINC01297	SNV
ENSG00000278175	9	39748514	39810097	-1	lincRNA	GLIDR	SNV
ENSG00000279072	7	56809214	56848800	-1	lincRNA	AC118758.3	SNV
ENSG00000245614	12	31020763	31073847	-1	antisense	DDX11-AS1	SNV
ENSG00000255052	8	12115782	12177550	1	antisense	FAM66D	SNV
ENSG00000254757	11	3469319	3531328	1	lincRNA	AC127526.1	SNV
ENSG00000282191	CHR_HSCHR8_8_CTG1	2033484	2039347	1	lincRNA	AC125453.1	SNV
ENSG00000238266	10	6779549	6879450	1	lincRNA	LINC00707	SNV
ENSG00000285939	17	53276760	54066825	-1	antisense	AC034268.2	SNV
ENSG00000283408	6	18522739	18674001	1	lincRNA	MIR548A1HG	SNV
ENSG00000275563	14	18977180	18980742	-1	antisense	AL929601.3	SNV
ENSG00000260804	2	216217045	216220192	1	lincRNA	LINC01963	SNV
ENSG00000226320	3	34159334	34562877	1	lincRNA	LINC01811	SNV
ENSG00000259867	16	80155053	80563135	-1	antisense	AC105411.1	SNV
ENSG00000235887	1	143499187	143500512	-1	lincRNA	AC239859.3	SNV
ENSG00000234665	9	62856999	62898087	-1	lincRNA	AL512625.3	SNV
ENSG00000285184	1	150045660	150067701	-1	bidirectional_promoter_lncRNA	AC244033.2	SNV
ENSG00000230806	1	121360156	121398806	-1	antisense	SRGAP2-AS1	SNV
ENSG00000258955	14	51304416	51328386	-1	lincRNA	LINC00519	SNV
ENSG00000175170	20	25763466	25868225	-1	lincRNA	FAM182B	SNV
ENSG00000248932	3	139389815	139583319	1	antisense	AC097103.2	SNV
ENSG00000275232	12	131447337	131455436	-1	lincRNA	AC073578.2	SNV
ENSG00000260372	18	26655742	27190698	1	antisense	AQP4-AS1	SNV
ENSG00000275239	9	41657708	41699072	-1	lincRNA	FAM242F	SNV
ENSG00000250994	5	134436711	134492519	1	lincRNA	AC005355.1	SNV
ENSG00000233644	13	111122652	111144264	1	sense_intronic	ARHGEF7-IT1	SNV
ENSG00000276095	22	18873543	18894407	-1	lincRNA	FAM230F	SNV
ENSG00000277128	14	19124807	19175530	-1	lincRNA	AL589743.4	SNV
ENSG00000236469	2	71002531	71064743	-1	antisense	AC007881.2	SNV
ENSG00000276462	9	41100794	41106229	-1	lincRNA	BX255923.2	SNV
ENSG00000261307	18	47501172	47558383	1	lincRNA	AC102797.1	SNV
ENSG00000247363	12	68674371	68687755	-1	lincRNA	AC090061.1	SNV
ENSG00000249348	4	39528019	39594707	1	antisense	UGDH-AS1	SNV
ENSG00000255422	11	118700427	118750263	1	antisense	AP002954.1	SNV
ENSG00000285875	6	140575788	140898381	-1	lincRNA	AL035446.2	SNV
ENSG00000225096	6	57961438	58438364	1	lincRNA	AL445250.1	SNV
ENSG00000225725	8	7955014	8008755	1	lincRNA	FAM66E	SNV
ENSG00000235146	1	587629	594768	1	lincRNA	AC114498.1	SNV
ENSG00000225484	10	79663088	79826594	-1	antisense	NUTM2B-AS1	SNV
ENSG00000236366	6	142526455	142637889	-1	lincRNA	AL359313.1	SNV
ENSG00000282103	CHR_HSCHR8_4_CTG1	737651	824587	1	antisense	DLGAP2	SNV
ENSG00000230645	2	150171423	150301080	1	lincRNA	LINC01818	SNV
ENSG00000248744	4	45009540	45051652	1	lincRNA	AC108467.1	SNV
ENSG00000285988	10	6737418	6840712	1	lincRNA	AL392086.3	SNV
ENSG00000230417	10	78179185	78551355	1	lincRNA	LINC00595	SNV
ENSG00000235724	2	161222785	161308303	-1	antisense	AC009299.3	SNV
ENSG00000227028	2	39786453	40255209	1	antisense	SLC8A1-AS1	SNV
ENSG00000225265	1	222589825	222593032	1	antisense	TAF1A-AS1	SNV
ENSG00000251165	4	186286094	186500997	-1	antisense	F11-AS1	SNV
ENSG00000248296	5	124492775	124536348	-1	lincRNA	AC025465.1	SNV
ENSG00000253690	8	28250063	28339255	-1	antisense	AC021678.2	SNV
ENSG00000267549	19	56314703	56341287	1	antisense	AC006116.8	SNV
ENSG00000274454	CHR_HSCHR11_1_CTG7	2887804	2903769	-1	antisense	SLC22A18AS	SNV
ENSG00000231535	Y	3002912	3102272	1	lincRNA	LINC00278	SNV
ENSG00000261083	4	124499942	124558434	-1	lincRNA	LINC02516	SNV
ENSG00000277260	9	42199000	42204988	1	lincRNA	FAM74A7	SNV
ENSG00000258977	14	81605347	81623061	-1	lincRNA	LINC01467	SNV
ENSG00000234352	7	136685559	137182107	-1	antisense	AC009264.1	SNV
ENSG00000276500	9	40505399	40566281	-1	lincRNA	BMS1P14	SNV
ENSG00000276502	9	41310816	41332962	-1	lincRNA	AL354718.2	SNV
ENSG00000285534	13	109478739	109731700	-1	lincRNA	AL163541.1	SNV
ENSG00000285909	11	122751147	122851617	-1	antisense	AP002762.1	SNV
ENSG00000235450	7	91380778	91556848	-1	lincRNA	AC079760.1	SNV
ENSG00000250493	11	120867933	120894797	-1	antisense	AP004147.1	SNV
ENSG00000249942	4	74552584	74589481	-1	antisense	AC239584.1	SNV
ENSG00000229751	10	13991815	14007526	1	antisense	AC044781.1	SNV
ENSG00000251513	5	97089075	97437217	1	lincRNA	LIX1-AS1	SNV
ENSG00000235609	21	14818843	15014430	-1	lincRNA	AF127577.4	SNV
ENSG00000266893	19	28491864	28632728	-1	lincRNA	AC005394.1	SNV
ENSG00000285845	10	6779608	6877888	1	lincRNA	AL392086.2	SNV
ENSG00000236559	20	31686216	31716825	1	antisense	AL117381.1	SNV
ENSG00000275676	9	61229913	61231863	-1	lincRNA	BX005040.1	SNV
ENSG00000258850	14	42412573	42528888	1	lincRNA	AL450442.1	SNV
ENSG00000253428	5	173689459	173705849	1	lincRNA	LINC01942	SNV
ENSG00000226337	9	68541036	68644442	1	lincRNA	AL353616.2	SNV
ENSG00000224063	2	187003220	187554663	1	antisense	AC007319.1	SNV
ENSG00000233571	X	34206725	34415537	-1	lincRNA	AL592043.1	SNV
ENSG00000280878	2	111468810	111637967	1	lincRNA	AC017002.5	SNV
ENSG00000285664	14	52791785	52930019	1	antisense	AL139317.5	SNV
ENSG00000251637	11	67886477	67906350	1	lincRNA	AP003716.1	SNV
ENSG00000230817	1	82903183	83166815	1	lincRNA	LINC01362	SNV
ENSG00000233797	6	96358374	96521669	-1	antisense	UFL1-AS1	SNV
ENSG00000228033	2	52722677	52910020	-1	lincRNA	AC010967.1	SNV
ENSG00000245832	11	81879851	82718082	-1	lincRNA	MIR4300HG	SNV
ENSG00000258666	14	100333790	100354061	1	antisense	AL157871.4	SNV
ENSG00000230317	X	51095844	51171400	-1	lincRNA	LINC01284	SNV
ENSG00000172965	2	111036776	111523376	-1	lincRNA	MIR4435-2HG	SNV
ENSG00000231143	6	94163920	94194658	1	lincRNA	AL157378.1	SNV
ENSG00000275450	9	41276280	41282846	1	lincRNA	PTGER4P2-CDK2AP2P2	SNV
ENSG00000281543	CHR_HSCHR4_6_CTG12	189780336	189944248	-1	lincRNA	FRG1-DT	SNV
ENSG00000244337	2	131958277	131965535	1	lincRNA	AJ239322.2	SNV
ENSG00000282588	CHR_HSCHR17_7_CTG4	36009598	36011654	1	antisense	AC069363.2	SNV
ENSG00000225655	9	41073710	41076392	1	lincRNA	BX255923.1	SNV
ENSG00000223379	9	61868727	61887084	1	lincRNA	AL391987.3	SNV
ENSG00000182824	22	18733914	18757906	1	lincRNA	FAM230E	SNV
ENSG00000263327	4	16226685	16320140	1	antisense	TAPT1-AS1	SNV
ENSG00000250075	4	67417305	67468251	-1	lincRNA	AC104806.2	SNV
ENSG00000255910	12	19775451	20009937	1	lincRNA	AC024901.1	SNV
ENSG00000280838	CHR_HSCHR4_1_CTG4	21582138	21620924	1	antisense	AC210756.1	SNV
ENSG00000236039	7	17405479	17558909	-1	lincRNA	AC019117.1	SNV
ENSG00000266903	19	44632199	44718759	-1	antisense	AC243964.2	SNV
ENSG00000282057	1	85482281	85578250	-1	lincRNA	AC092807.3	SNV
ENSG00000259712	15	52056675	52100523	-1	antisense	AC023906.5	SNV
ENSG00000278849	9	66159954	66179430	-1	lincRNA	AL513478.2	SNV
ENSG00000223482	10	87203875	87342612	-1	antisense	NUTM2A-AS1	SNV
ENSG00000243144	7	91311368	91515409	1	lincRNA	AC079760.2	SNV
ENSG00000279278	22	22264601	22273020	1	lincRNA	AC245060.6	SNV
ENSG00000226091	12	8295986	8396803	-1	lincRNA	LINC00937	SNV
ENSG00000250754	4	185051896	185107248	1	lincRNA	LINC02436	SNV
ENSG00000276241	17	36116177	36177510	1	antisense	AC243829.2	SNV
ENSG00000255191	11	69985876	70015815	1	lincRNA	AP003555.3	SNV
ENSG00000259617	15	40999274	41004865	1	antisense	AC020661.3	SNV
ENSG00000241316	3	67654697	67947713	1	lincRNA	SUCLG2-AS1	SNV
ENSG00000226007	9	62532337	62534724	1	lincRNA	BX005266.2	SNV
ENSG00000251458	5	176124210	176131461	-1	lincRNA	AC139491.4	SNV
ENSG00000231539	7	42829672	42844438	-1	lincRNA	AC010132.1	SNV
ENSG00000257894	12	79341205	79503396	-1	lincRNA	AC027288.3	SNV
ENSG00000236318	7	17374867	17467256	1	lincRNA	AC019117.2	SNV
ENSG00000253220	8	126497385	126500440	1	lincRNA	AC084116.1	SNV
ENSG00000263307	16	11851649	11895611	1	antisense	AC007216.4	SNV
ENSG00000282863	10	78179174	78675109	1	lincRNA	AC012560.1	SNV
ENSG00000247228	16	70156340	70173448	-1	antisense	AC009060.1	SNV
ENSG00000215256	14	23938731	23988839	-1	antisense	DHRS4-AS1	SNV
ENSG00000215483	13	40079106	40535807	-1	lincRNA	LINC00598	SNV
ENSG00000251131	5	43018429	43024247	1	antisense	AC025171.3	SNV
ENSG00000282395	CHR_HSCHR8_1_CTG6	57193590	57252058	1	lincRNA	LINC01606	SNV
ENSG00000230500	10	27744786	27767794	1	antisense	MKX-AS1	SNV
ENSG00000228010	7	6663974	6708901	1	antisense	AC073343.2	SNV
ENSG00000237188	1	147173186	147252659	1	antisense	AC242426.2	SNV
ENSG00000254631	11	74397549	74485742	1	antisense	AP001372.1	SNV
ENSG00000258314	14	19024090	19055551	1	lincRNA	AL589182.1	SNV
ENSG00000267121	17	45190931	45222222	-1	antisense	AC008105.3	SNV
ENSG00000274265	1	149176022	149251013	1	lincRNA	AC245297.3	SNV
ENSG00000256469	11	94874052	94925521	-1	antisense	AP002383.2	SNV
ENSG00000203472	16	75475896	75495407	1	antisense	AC009163.1	SNV
ENSG00000235016	3	50116022	50156085	-1	antisense	SEMA3F-AS1	SNV
ENSG00000224363	1	144641371	144919902	1	lincRNA	FP700111.1	SNV
ENSG00000284070	22	24645171	24651657	-1	antisense	AP000356.2	SNV
ENSG00000258410	15	20128745	20147953	-1	lincRNA	AC087386.1	SNV
ENSG00000214548	14	100779410	100861031	1	lincRNA	MEG3	SNV
ENSG00000259905	15	24493137	24652130	1	lincRNA	PWRN1	SNV
ENSG00000257342	12	57694132	57721510	-1	antisense	AC025165.2	SNV
ENSG00000271758	11	7704628	7882947	-1	lincRNA	AC044810.3	SNV
ENSG00000261634	15	69278328	69298763	-1	antisense	AC026992.2	SNV
ENSG00000250748	12	65466820	65642372	-1	lincRNA	AC025419.1	SNV
ENSG00000215112	9	39371065	39376916	1	lincRNA	FAM74A1	SNV
ENSG00000232598	6	36940071	36944675	-1	lincRNA	AL122034.1	SNV
ENSG00000178440	10	49972763	49982053	1	lincRNA	LINC00843	SNV
ENSG00000244733	10	79660891	79677996	1	lincRNA	AL132656.2	SNV
ENSG00000197182	22	46053869	46113928	1	lincRNA	MIRLET7BHG	SNV
ENSG00000240350	2	111491273	111570974	1	lincRNA	AC017002.3	SNV
ENSG00000214900	14	49927571	50092643	-1	lincRNA	LINC01588	SNV
ENSG00000224919	10	47496212	47502195	1	antisense	AL591684.1	SNV
ENSG00000265533	18	67516546	67899619	1	lincRNA	AC114689.3	SNV
ENSG00000251324	5	73454187	73472896	-1	antisense	LINC01386	SNV
ENSG00000248265	12	54058254	54122234	1	lincRNA	FLJ12825	SNV
ENSG00000236256	X	97431286	97642589	-1	antisense	DIAPH2-AS1	SNV
ENSG00000259504	15	69278675	69295322	1	lincRNA	AC026992.1	SNV
ENSG00000275390	9	40767870	40806344	1	lincRNA	AL353626.1	SNV
ENSG00000227674	13	63851197	64076044	-1	lincRNA	LINC00355	SNV
ENSG00000230876	2	32825359	32926693	1	lincRNA	LINC00486	CNV
ENSG00000233926	9	81689713	81776900	1	lincRNA	AL591368.1	CNV
ENSG00000234377	13	77919689	78617328	1	antisense	RNF219-AS1	CNV
ENSG00000253103	8	111098961	111236203	-1	lincRNA	LINC01609	CNV
ENSG00000261978	17	80023894	80026107	1	antisense	AC116025.1	CNV
ENSG00000250131	4	177444979	177677126	1	antisense	AC078881.1	CNV
ENSG00000233848	6	20756103	20800694	-1	antisense	AL513188.1	CNV
ENSG00000267922	19	46101122	46196218	1	lincRNA	AC007785.1	CNV
ENSG00000260808	11	68612899	68616711	-1	lincRNA	AP003096.1	CNV
ENSG00000272758	3	122416207	122443180	1	antisense	AC083798.2	CNV
ENSG00000257239	12	41829898	41932592	-1	lincRNA	AC090630.1	CNV
ENSG00000249635	4	106003317	106022478	-1	antisense	AC109361.1	CNV
ENSG00000283415	11	6821942	6926877	-1	lincRNA	AC087280.2	CNV
ENSG00000271871	5	141952419	141953375	1	antisense	AC005740.4	CNV
ENSG00000253194	6	118934770	119182745	1	antisense	AL137009.1	CNV
ENSG00000266268	18	4775054	5004537	-1	lincRNA	AP005203.1	CNV
ENSG00000253807	5	124059794	124405079	-1	lincRNA	LINC01170	CNV
ENSG00000232935	10	127013501	127026475	-1	antisense	AL359094.2	CNV
ENSG00000237978	3	178526505	178860405	-1	antisense	KCNMB2-AS1	CNV
ENSG00000270104	1	228384114	228385016	-1	lincRNA	AL670729.3	CNV
ENSG00000253930	8	23189279	23190675	1	antisense	TNFRSF10A-AS1	CNV
ENSG00000255240	11	58933643	59058659	-1	antisense	AP001636.3	CNV
ENSG00000248210	4	149154295	149278123	1	lincRNA	LINC02355	CNV
ENSG00000226194	6	169369998	169388385	-1	lincRNA	LINC02519	CNV
ENSG00000254300	8	76406654	76524356	1	lincRNA	LINC01111	CNV
ENSG00000251095	4	89551356	89726752	1	antisense	AC097478.1	CNV
ENSG00000246211	11	74311362	74324705	1	lincRNA	P4HA3-AS1	CNV
ENSG00000261216	16	11908208	11908916	1	antisense	AC007216.2	CNV
ENSG00000272243	6	74530248	74734279	-1	lincRNA	AL356277.3	CNV
ENSG00000248510	4	96310701	96818864	1	lincRNA	LINC02267	CNV
ENSG00000259736	15	90620007	90717141	-1	antisense	CRTC3-AS1	CNV
ENSG00000249174	5	18965861	19142346	-1	lincRNA	AC106744.1	CNV
ENSG00000251488	4	132836772	132981677	-1	lincRNA	AC115622.1	CNV
ENSG00000231383	3	192238037	192283097	1	antisense	FGF12-AS1	CNV
ENSG00000253616	8	23071377	23074488	-1	antisense	AC107959.3	CNV
ENSG00000258859	14	87353070	87573022	-1	lincRNA	LINC02296	CNV
ENSG00000189229	3	6490479	6736129	1	lincRNA	AC069277.1	CNV
ENSG00000264754	17	67524481	67525422	1	sense_intronic	AC110921.1	CNV
ENSG00000272142	6	5029972	5043449	1	lincRNA	AL359643.3	CNV
ENSG00000236451	2	220450679	220704566	1	lincRNA	AC067956.1	CNV
ENSG00000284948	8	23084355	23103558	1	lincRNA	AC107959.4	CNV
ENSG00000254538	8	73670441	73732897	1	lincRNA	AC027018.1	CNV
ENSG00000232234	6	8102711	8343139	1	bidirectional_promoter_lncRNA	AL355499.1	CNV
ENSG00000244625	22	26672767	26780207	1	lincRNA	MIATNB	CNV
ENSG00000251574	5	104383298	105392970	-1	lincRNA	AC099520.1	CNV
ENSG00000246130	8	23068229	23083619	1	antisense	AC107959.2	CNV
ENSG00000255621	12	13000451	13040679	1	lincRNA	AC023790.2	CNV
ENSG00000235749	1	247639749	247747062	1	antisense	AL390860.1	CNV
ENSG00000225775	6	9124221	9161777	-1	lincRNA	AL137220.1	CNV
ENSG00000245937	5	127940426	128083172	-1	lincRNA	LINC01184	CNV
ENSG00000224853	13	73413473	73661891	-1	lincRNA	LINC00393	CNV
ENSG00000234810	1	55329288	56070513	1	lincRNA	AL603840.1	CNV
ENSG00000241168	3	163026396	163232149	1	lincRNA	AC128685.1	CNV
ENSG00000269155	6	167795530	167798248	1	lincRNA	AL009178.2	CNV
ENSG00000226258	3	6631689	6805449	-1	lincRNA	GRM7-AS3	CNV
ENSG00000226486	1	188905688	189037262	1	lincRNA	LINC01035	CNV
ENSG00000228944	7	24196662	24255719	-1	antisense	AC004485.1	CNV
ENSG00000223653	1	85276715	85448124	1	antisense	AL078459.1	CNV
ENSG00000231298	10	4650185	4678154	-1	lincRNA	MANCR	CNV
ENSG00000248323	5	91054834	91314547	-1	antisense	LUCAT1	CNV
ENSG00000203527	22	43275955	43283830	1	antisense	Z99756.1	CNV
ENSG00000204990	7	141414383	141416390	-1	lincRNA	AC005692.1	CNV
ENSG00000258897	14	34040097	34059300	1	antisense	EGLN3-AS1	CNV
ENSG00000260551	15	24162754	24169948	-1	lincRNA	PWRN2	CNV
ENSG00000285201	1	84038529	84065031	1	lincRNA	AC104454.2	CNV
ENSG00000249731	5	1968094	1969013	1	lincRNA	AC126768.3	CNV
ENSG00000258168	12	70468080	70543040	1	antisense	AC025569.1	CNV
ENSG00000249307	4	78971748	79308798	1	antisense	LINC01088	CNV
ENSG00000233067	X	22259797	23293146	-1	lincRNA	PTCHD1-AS	CNV
ENSG00000230063	1	212297448	212299579	1	sense_intronic	AL360091.2	CNV
ENSG00000254099	5	141970637	141982687	-1	antisense	AC005740.3	CNV
ENSG00000224141	21	18561265	18760003	-1	lincRNA	MIR548XHG	CNV
ENSG00000258343	12	95795345	95858839	-1	antisense	AC090001.1	CNV
ENSG00000255171	11	41714534	41857733	1	lincRNA	LINC01499	CNV
ENSG00000245768	16	58733912	59108974	1	lincRNA	AC092378.1	CNV
ENSG00000223727	3	3250687	3627296	-1	lincRNA	AC034195.1	CNV
ENSG00000258657	14	24595723	24657774	1	antisense	AL136018.1	CNV
ENSG00000236700	6	134437716	134504581	1	lincRNA	LINC01010	CNV
ENSG00000240405	3	69999550	70518064	1	lincRNA	SAMMSON	CNV
ENSG00000235140	10	59578467	59650345	1	lincRNA	AC026391.1	CNV
ENSG00000225316	13	19561328	19588350	1	lincRNA	LINC00350	CNV
ENSG00000223598	6	151088103	151228447	-1	antisense	AL138733.1	CNV
ENSG00000263720	18	65865262	65866397	1	sense_intronic	AC023394.2	CNV
ENSG00000229791	13	19408042	19409529	-1	lincRNA	AL356259.1	CNV
ENSG00000228262	2	33706886	34738231	1	lincRNA	LINC01320	CNV
ENSG00000271978	6	5031756	5054423	-1	lincRNA	AL359643.2	CNV
ENSG00000235180	10	126413869	126421879	-1	lincRNA	LINC00601	CNV
ENSG00000240893	3	112736447	112749319	-1	lincRNA	LINC02042	CNV
ENSG00000226566	9	103361952	103429892	-1	lincRNA	AL390962.1	CNV
ENSG00000255968	12	26318953	26421462	1	antisense	AC024145.1	CNV
ENSG00000233290	1	82212413	82848205	-1	lincRNA	AL157944.1	CNV
ENSG00000253766	5	21616262	21779522	1	antisense	AC091946.1	CNV
ENSG00000231131	10	52450874	52755409	-1	lincRNA	LNCAROD	CNV
ENSG00000284959	14	81012099	81170414	-1	antisense	AC007262.2	CNV
ENSG00000254101	8	135859369	137092183	1	lincRNA	LINC02055	CNV
ENSG00000250697	5	32925639	33297910	-1	lincRNA	AC010343.3	CNV
ENSG00000241921	7	126378970	126424185	1	antisense	AC000372.1	CNV
ENSG00000254733	11	86431590	86622867	1	antisense	AP001831.1	CNV
ENSG00000272369	12	46537502	46652550	1	lincRNA	AC008035.1	CNV
ENSG00000231971	6	134428240	134520585	-1	lincRNA	AL078590.2	CNV
ENSG00000223826	2	101479390	101486822	1	lincRNA	LINC01870	CNV
ENSG00000232934	10	112395813	112425589	-1	antisense	AL157786.1	CNV
ENSG00000259042	14	22417836	22418657	1	lincRNA	AC244502.3	CNV
ENSG00000282022	12	8858143	8915276	-1	antisense	AC006581.2	CNV
ENSG00000223786	6	74069451	74690727	1	lincRNA	AL357507.1	CNV
ENSG00000258131	12	96985656	97185609	1	lincRNA	AC007656.1	CNV
ENSG00000146521	6	167784537	167796859	-1	lincRNA	LINC01558	CNV
ENSG00000229671	11	1897015	1908656	1	lincRNA	LINC01150	CNV
ENSG00000285212	6	167796647	167825145	1	lincRNA	AL009178.3	CNV
ENSG00000285216	6	8158162	8760447	1	bidirectional_promoter_lncRNA	AL355499.2	CNV
ENSG00000285741	7	51471717	51729716	1	lincRNA	AC005999.2	CNV
ENSG00000235288	3	42785087	42852428	-1	antisense	AC099329.1	CNV
ENSG00000203688	6	167679626	167696290	-1	lincRNA	LINC02487	CNV
ENSG00000267193	18	45669367	45747215	-1	antisense	AC023421.2	CNV
ENSG00000253288	8	137809444	138083570	-1	lincRNA	AC046195.1	CNV
ENSG00000257599	12	29389289	29487488	1	antisense	OVCH1-AS1	CNV
ENSG00000227110	3	7952805	8611924	-1	antisense	LMCD1-AS1	CNV
ENSG00000226759	1	57860532	57880905	1	antisense	DAB1-AS1	CNV
ENSG00000241449	7	150040521	150076655	1	lincRNA	AC092666.1	CNV
ENSG00000249614	4	103961616	104036923	1	lincRNA	LINC02503	CNV
ENSG00000229249	13	78012883	78053595	1	lincRNA	LINC00446	CNV
ENSG00000260971	1	56154545	56477687	-1	lincRNA	AC119674.1	CNV
ENSG00000249201	5	1173141	1178605	-1	antisense	CTD-3080P12.3	CNV
ENSG00000226352	13	19674624	19675884	1	antisense	PSPC1-AS2	CNV
ENSG00000233079	1	55868254	55950119	1	lincRNA	LINC01755	CNV
ENSG00000230250	1	55915607	55944974	-1	lincRNA	LINC01753	CNV
ENSG00000198221	6	167823876	167826709	-1	lincRNA	AFDN-DT	CNV
ENSG00000282478	20	11536406	11541647	-1	lincRNA	AL109837.2	CNV
ENSG00000228393	7	104950315	105013044	-1	antisense	LINC01004	CNV
ENSG00000285560	15	90630535	90631755	-1	antisense	AC103739.3	CNV
ENSG00000285769	11	112637342	112751131	1	lincRNA	AP003100.2	CNV
ENSG00000283517	17	71829870	71871750	-1	lincRNA	AC005144.1	CNV
ENSG00000260653	7	57404771	57416203	1	lincRNA	AC237221.1	CNV
ENSG00000260658	16	63314264	63618046	-1	lincRNA	AC138305.1	CNV
ENSG00000285940	18	37565281	37762131	1	antisense	AC009899.1	CNV
ENSG00000228714	9	115324932	115744330	-1	antisense	AL691420.1	CNV
ENSG00000225391	6	136982165	136993234	-1	lincRNA	NHEG1	CNV
ENSG00000236283	2	164840672	165208261	1	antisense	AC019197.1	CNV
ENSG00000265737	18	14816151	14825249	-1	antisense	AP006565.1	CNV
ENSG00000239335	12	66130751	66134449	1	antisense	LLPH-DT	CNV
ENSG00000272549	6	167666840	167679270	-1	lincRNA	LINC02538	CNV
ENSG00000249476	5	109237120	109326369	-1	lincRNA	AC008467.1	CNV
ENSG00000242009	3	81840547	81922861	1	lincRNA	AC129807.1	CNV
ENSG00000260780	15	24206784	24225854	1	lincRNA	AC087463.1	CNV
ENSG00000278925	5	141825708	141826325	-1	lincRNA	AC005753.1	CNV
ENSG00000248307	4	138027422	138130709	-1	lincRNA	LINC00616	CNV
ENSG00000203506	3	29526251	29642809	-1	antisense	RBMS3-AS2	CNV
ENSG00000263878	18	3962353	4013943	1	antisense	DLGAP1-AS4	CNV
ENSG00000251182	4	31171144	31211675	1	lincRNA	LINC02497	CNV
ENSG00000249899	5	52932419	52990278	-1	antisense	AC025180.1	CNV
ENSG00000230400	20	22668484	22685344	-1	lincRNA	LINC01747	CNV
ENSG00000280485	10	93772681	93788605	-1	antisense	AL358154.1	CNV
ENSG00000243701	3	107240692	107326964	1	lincRNA	DUBR	CNV
ENSG00000267374	18	39206924	39800318	-1	lincRNA	AC016205.1	CNV
ENSG00000230061	21	44414588	44425272	-1	antisense	TRPM2-AS	CNV
ENSG00000248656	4	111640495	111648808	1	lincRNA	AC083795.2	CNV
ENSG00000264015	18	77421619	77560763	1	lincRNA	AC124254.1	CNV
ENSG00000282998	2	49202126	49451896	-1	lincRNA	AC009975.2	CNV
ENSG00000232977	13	23466571	23487464	1	lincRNA	LINC00327	CNV
ENSG00000231749	17	68944531	69042784	1	antisense	ABCA9-AS1	CNV
ENSG00000270111	10	10418739	10462349	-1	lincRNA	AL583859.2	CNV
ENSG00000231969	2	149587196	149848233	1	antisense	AC007364.1	CNV
ENSG00000239828	3	107272611	107421304	-1	lincRNA	AC063944.1	CNV
ENSG00000248432	4	111804418	111809694	-1	lincRNA	AC139718.1	CNV
ENSG00000232243	13	19262797	19263873	-1	lincRNA	AL139327.2	CNV
ENSG00000248874	5	23951348	24178263	1	lincRNA	C5orf17	CNV
ENSG00000223528	10	126988095	127026507	-1	antisense	AL359094.1	CNV
ENSG00000251141	5	44744900	44808777	-1	antisense	MRPS30-DT	CNV
ENSG00000284600	2	1795525	1811526	1	antisense	AC093390.2	CNV
ENSG00000250855	4	111802801	111839886	1	lincRNA	AC139718.2	CNV
ENSG00000224165	2	24971390	25039694	1	antisense	DNAJC27-AS1	CNV
ENSG00000279175	22	44102779	44116232	1	sense_intronic	AL033543.1	CNV
ENSG00000248197	4	181064089	181159149	-1	lincRNA	LINC00290	CNV
ENSG00000258551	15	91408708	91605211	1	lincRNA	CRAT37	CNV
ENSG00000258558	14	30734926	30822702	-1	antisense	AL121852.1	CNV
ENSG00000237838	3	24687919	25174305	1	lincRNA	AC092422.1	CNV
ENSG00000257410	12	71793855	71799627	-1	lincRNA	AC089984.1	CNV
ENSG00000258700	14	45940943	46501823	1	lincRNA	LINC00871	CNV
ENSG00000285955	10	122435924	122461383	-1	antisense	BX842242.1	CNV
ENSG00000260136	16	23452758	23457606	1	lincRNA	AC008915.2	CNV
ENSG00000229495	6	78809715	78813303	-1	lincRNA	AL450327.1	CNV
ENSG00000259546	15	80896190	80948867	-1	antisense	AC027808.1	CNV
ENSG00000250049	5	92082597	92479426	1	lincRNA	AC114316.2	CNV
ENSG00000215424	21	46229217	46259390	1	antisense	MCM3AP-AS1	CNV
ENSG00000250716	5	3496229	3504004	-1	lincRNA	LINC01017	CNV
ENSG00000282890	2	48809340	49419013	1	lincRNA	AC009975.1	CNV
ENSG00000258172	12	94272150	94277195	-1	antisense	AC073655.1	CNV
ENSG00000261807	16	59855353	60053973	1	lincRNA	LINC02141	CNV
ENSG00000231246	1	112177234	112360528	-1	lincRNA	AL445426.1	CNV
ENSG00000232130	3	193144464	193176864	-1	lincRNA	AC092966.1	CNV
ENSG00000238198	1	113011687	113073105	-1	lincRNA	AL357055.3	CNV
ENSG00000261193	16	88079161	88087383	-1	lincRNA	AC134312.4	CNV
ENSG00000249815	4	111826881	112072698	-1	lincRNA	AC004704.1	CNV
ENSG00000241397	3	116552473	116568264	1	antisense	LINC00903	CNV
ENSG00000260959	15	24238145	24240192	-1	lincRNA	AC087463.2	CNV
ENSG00000246250	11	43829709	43880726	-1	antisense	AC087521.2	CNV
ENSG00000235050	6	53978549	54079726	-1	antisense	MLIP-AS1	CNV
ENSG00000236834	13	19345049	19346749	1	lincRNA	LINC00421	CNV
ENSG00000162947	2	149767506	149859191	-1	lincRNA	LINC01931	CNV
ENSG00000259579	15	100716249	100828497	1	lincRNA	AC087762.1	CNV
ENSG00000236404	9	2421597	2643359	-1	antisense	VLDLR-AS1	INDEL
ENSG00000265987	17	75344405	75373662	1	antisense	AC011933.4	INDEL
ENSG00000236306	9	25780056	25812968	1	lincRNA	LINC01241	INDEL
ENSG00000232790	7	20835431	21023148	1	lincRNA	LINC01162	INDEL
ENSG00000261235	16	82044336	82139631	-1	antisense	AC092142.1	INDEL
ENSG00000240553	1	23020147	23088058	-1	antisense	AL031428.1	INDEL
ENSG00000234929	2	2641989	2656630	-1	lincRNA	AC018685.2	INDEL
ENSG00000236013	6	139976352	140093721	1	lincRNA	AL357146.1	INDEL
ENSG00000263745	18	1883524	2489426	-1	lincRNA	AP005230.1	INDEL
ENSG00000223511	X	1732584	1763212	1	lincRNA	AL683807.1	INDEL
ENSG00000268390	19	51043806	51052077	1	lincRNA	AC011473.1	INDEL
ENSG00000234021	9	8936079	8963077	1	lincRNA	AL596451.1	INDEL
ENSG00000226674	2	144667967	145262988	1	lincRNA	TEX41	INDEL
ENSG00000237125	4	173527270	173659696	1	antisense	HAND2-AS1	INDEL
ENSG00000271763	15	92602910	92620015	1	antisense	AC091544.5	INDEL
ENSG00000248973	5	4451930	4866221	-1	lincRNA	AC106799.2	INDEL
ENSG00000227486	X	55908123	56015173	1	lincRNA	AL445472.1	INDEL
ENSG00000224812	10	44811024	44959689	-1	antisense	TMEM72-AS1	INDEL
ENSG00000279440	22	27019369	27024550	1	lincRNA	AL008638.3	INDEL
ENSG00000251339	4	58780626	58984152	-1	lincRNA	AC017091.1	INDEL
ENSG00000197099	3	186579476	186772986	-1	antisense	AC068631.1	INDEL
ENSG00000231993	22	41174591	41197456	-1	antisense	EP300-AS1	INDEL
ENSG00000285838	6	68040290	68083574	1	lincRNA	AL646090.2	INDEL
ENSG00000253658	8	68911803	69104190	-1	lincRNA	LINC01592	INDEL
ENSG00000239440	3	81986138	82463675	1	lincRNA	LINC02008	INDEL
ENSG00000225263	13	66977432	66985776	1	antisense	PCDH9-AS3	INDEL
ENSG00000250125	4	64914281	65024485	-1	lincRNA	LINC02232	INDEL
ENSG00000230186	1	143905487	143934776	1	antisense	AC246680.1	INDEL
ENSG00000237460	1	106818239	106838167	1	lincRNA	LINC01661	INDEL
ENSG00000260340	16	84928353	84939603	1	lincRNA	LINC02176	INDEL
ENSG00000222041	2	87454781	87636740	1	lincRNA	CYTOR	INDEL
ENSG00000246662	8	93213302	93700433	-1	antisense	LINC00535	INDEL
ENSG00000272328	7	8303741	8341343	1	lincRNA	AC007128.2	INDEL
ENSG00000229656	10	32958845	33082102	1	lincRNA	ITGB1-DT	INDEL
ENSG00000234229	9	106664754	106702662	1	lincRNA	LINC01505	INDEL
ENSG00000235725	2	65589566	65640177	-1	lincRNA	AC007389.3	INDEL
ENSG00000234520	7	112954646	112995634	-1	lincRNA	HRAT17	INDEL
ENSG00000259899	16	12560756	12611044	-1	antisense	AC010333.2	INDEL
ENSG00000283579	13	26965967	26991996	-1	lincRNA	AL160035.1	INDEL
ENSG00000231482	2	1366234	1580747	-1	lincRNA	AC105450.1	INDEL
ENSG00000260158	16	32809556	32824645	1	lincRNA	AC137761.1	INDEL
ENSG00000237773	7	16970320	17299357	-1	antisense	AC073332.1	INDEL
ENSG00000255039	11	97222644	97259987	-1	lincRNA	LINC02553	INDEL
ENSG00000257815	12	69904033	70243360	-1	antisense	LINC01481	INDEL
ENSG00000273550	13	63034992	63097797	1	lincRNA	AL354810.1	INDEL
ENSG00000227082	1	121396754	121463429	1	lincRNA	AC244021.1	INDEL
ENSG00000267476	18	58672613	58752730	-1	antisense	AC104365.1	INDEL
ENSG00000242593	7	124032205	124395118	1	antisense	AC006148.1	INDEL
ENSG00000233891	2	59238714	59733396	-1	lincRNA	AC007179.2	INDEL
ENSG00000251412	4	14383123	14409078	-1	lincRNA	AC006296.2	INDEL
ENSG00000248869	4	136796722	137212799	-1	lincRNA	LINC02511	INDEL
ENSG00000232754	22	41169190	41183144	-1	antisense	AL035658.1	INDEL
ENSG00000228918	1	182129310	182314061	-1	lincRNA	LINC01344	INDEL
ENSG00000263321	17	82729164	82734143	-1	lincRNA	AC024361.3	INDEL
ENSG00000237686	6	43995723	44074652	-1	antisense	AL109615.3	INDEL
ENSG00000246394	12	133030389	133037222	-1	lincRNA	AC073911.1	INDEL
ENSG00000235026	2	115130935	115161343	-1	antisense	DPP10-AS1	INDEL
ENSG00000274469	20	37571103	37583935	1	lincRNA	LINC01746	INDEL
ENSG00000227517	17	69577251	69903000	1	lincRNA	LINC01483	INDEL
ENSG00000283692	X	137573752	137981763	1	lincRNA	Z96074.1	INDEL
ENSG00000266978	19	10252268	10285108	-1	antisense	AC011511.2	INDEL
ENSG00000281641	8	118621001	118858218	1	lincRNA	SAMD12-AS1	INDEL
ENSG00000257165	12	78448995	78540675	-1	lincRNA	AC079362.1	INDEL
ENSG00000279501	21	8996496	9018670	-1	lincRNA	CR392039.3	INDEL
ENSG00000234161	X	91414878	91434999	-1	antisense	PABPC5-AS1	INDEL
ENSG00000253535	8	24295814	24912073	-1	antisense	AC120193.1	INDEL
ENSG00000277448	13	58165827	58209483	1	lincRNA	LINC02338	INDEL
ENSG00000259124	14	76495363	76726712	-1	lincRNA	AC008050.1	INDEL
ENSG00000241956	5	164296696	165171643	1	antisense	AC109466.1	INDEL
ENSG00000231817	13	46455132	46515958	-1	lincRNA	LINC01198	INDEL
ENSG00000236449	2	174547141	174774827	1	antisense	AC010894.3	INDEL
ENSG00000285554	1	150173049	150181429	1	lincRNA	AC242988.2	INDEL
ENSG00000259817	16	73812621	73816053	1	lincRNA	AC087565.1	INDEL
ENSG00000285731	3	17141015	17205165	1	lincRNA	AC090644.1	INDEL
ENSG00000271955	2	59218680	60100200	-1	lincRNA	AC007100.1	INDEL
ENSG00000272575	11	128208749	128241441	1	lincRNA	LINC02098	INDEL
ENSG00000206187	15	25902360	26053120	1	lincRNA	LINC02346	INDEL
ENSG00000271717	19	8222153	8239648	-1	antisense	AC022146.2	INDEL
ENSG00000259471	15	66582190	66685794	1	lincRNA	LINC01169	INDEL
ENSG00000259475	15	98954149	99105824	-1	antisense	AC036108.1	INDEL

## Sheet: Table S2
Supplementary Table 2. The enrichment analysis results of the top 10 enriched drugs using the DrugPattern tool
Category	Term	Count	Percent	Fold	P-value	Bonferroni	FDR
ADReC (Drug categories with the similar adverse drug reaction)	Abdominal Pain	2	0.00302115	5.98006	0.044849	1	0.0635
ADReC (Drug categories with the similar adverse drug reaction)	Abdominal Pain Upper	1	0.00609756	12.0695	0.0795332	1	0.0945
ADReC (Drug categories with the similar adverse drug reaction)	Abscess	1	0.00917431	18.1596	0.0535916	1	0.0716
ADReC (Drug categories with the similar adverse drug reaction)	Accommodation Disorder	1	0.0163934	32.4492	0.0303549	1	0.0494
ADReC (Drug categories with the similar adverse drug reaction)	Acne	1	0.00546448	10.8164	0.0883286	1	0.1015
ADReC (Drug categories with the similar adverse drug reaction)	Acute Coronary Syndrome	1	0.00480769	9.51635	0.0997735	1	0.1105
ADReC (Drug categories with the similar adverse drug reaction)	Adrenal Insufficiency	1	0.0384615	76.1308	0.0130527	1	0.0319
ADReC (Drug categories with the similar adverse drug reaction)	Affect Lability	1	0.00552486	10.9359	0.0874067	1	0.1011
ADReC (Drug categories with the similar adverse drug reaction)	Aggression	1	0.00892857	17.6732	0.0550253	1	0.073
ADReC (Drug categories with the similar adverse drug reaction)	Agitation	2	0.00514139	10.1769	0.0169251	1	0.036
ADReC (Drug categories with the similar adverse drug reaction)	Agranulocytosis	2	0.00735294	14.5544	0.00859342	1	0.0264
ADReC (Drug categories with the similar adverse drug reaction)	Allergic Reaction	1	0.00549451	10.8758	0.0878677	1	0.1012
ADReC (Drug categories with the similar adverse drug reaction)	Alopecia	2	0.00502513	9.94673	0.0176656	1	0.0366
ADReC (Drug categories with the similar adverse drug reaction)	Amnesia	1	0.00555556	10.9967	0.0869454	1	0.1008
ADReC (Drug categories with the similar adverse drug reaction)	Anaemia	2	0.00378072	7.48355	0.0299056	1	0.0491
ADReC (Drug categories with the similar adverse drug reaction)	Anaphylactic Reaction	2	0.00687285	13.6041	0.00977624	1	0.0284
ADReC (Drug categories with the similar adverse drug reaction)	Anaphylactic Shock	2	0.00501253	9.9218	0.0177487	1	0.0367
ADReC (Drug categories with the similar adverse drug reaction)	Angioedema	2	0.00537634	10.6419	0.0155637	1	0.0346
ADReC (Drug categories with the similar adverse drug reaction)	Angiopathy	1	0.00540541	10.6995	0.0892495	1	0.102
ADReC (Drug categories with the similar adverse drug reaction)	Ankle Edema	1	0.2	395.88	0.00252347	1	0.0164
ADReC (Drug categories with the similar adverse drug reaction)	Anorectal Disorder	1	0.016129	31.9258	0.0308448	1	0.05
ADReC (Drug categories with the similar adverse drug reaction)	Anorexia	3	0.00606061	11.9964	0.00215232	1	0.0164
ADReC (Drug categories with the similar adverse drug reaction)	Anosmia	1	0.0588235	116.435	0.00855384	1	0.0264
ADReC (Drug categories with the similar adverse drug reaction)	Anxiety	2	0.00421053	8.33432	0.0245396	1	0.0439
ADReC (Drug categories with the similar adverse drug reaction)	Arrhythmia	1	0.0026738	5.29251	0.172208	1	0.1761
ADReC (Drug categories with the similar adverse drug reaction)	Arrhythmia Supraventricular	1	0.025641	50.7538	0.019515	1	0.0386
ADReC (Drug categories with the similar adverse drug reaction)	Arthralgia	1	0.002	3.9588	0.223272	1	0.2243
ADReC (Drug categories with the similar adverse drug reaction)	Arthritis	1	0.00529101	10.473	0.0910886	1	0.1035
ADReC (Drug categories with the similar adverse drug reaction)	Arthritis Aggravated	1	0.0909091	179.945	0.00554322	1	0.0219
ADReC (Drug categories with the similar adverse drug reaction)	Asthenia	3	0.00420757	8.32847	0.00593934	1	0.0223
ADReC (Drug categories with the similar adverse drug reaction)	Ataxia	1	0.00434783	8.60609	0.109726	1	0.1186
ADReC (Drug categories with the similar adverse drug reaction)	Atrial Fibrillation	1	0.00520833	10.3094	0.0924654	1	0.1046
ADReC (Drug categories with the similar adverse drug reaction)	Atrioventricular Block	1	0.00840336	16.6336	0.058362	1	0.0764
ADReC (Drug categories with the similar adverse drug reaction)	Back Pain	1	0.00239808	4.74676	0.190002	1	0.1936
ADReC (Drug categories with the similar adverse drug reaction)	Benign Intracranial Hypertension	1	0.037037	73.3111	0.0135513	1	0.0327
ADReC (Drug categories with the similar adverse drug reaction)	Blindness	1	0.00456621	9.03836	0.104764	1	0.1147
ADReC (Drug categories with the similar adverse drug reaction)	Blood Alkaline Phosphatase Increased	1	0.00512821	10.1508	0.0938402	1	0.1054
ADReC (Drug categories with the similar adverse drug reaction)	Blood Glucose Abnormal	1	0.0526316	104.179	0.00955535	1	0.0279
ADReC (Drug categories with the similar adverse drug reaction)	Blood Prolactin Increased	1	0.0769231	152.262	0.00654778	1	0.0231
ADReC (Drug categories with the similar adverse drug reaction)	Body Temperature Increased	3	0.00588235	11.6435	0.00234119	1	0.0164
ADReC (Drug categories with the similar adverse drug reaction)	Bone Disorder	1	0.0185185	36.6556	0.0269189	1	0.0461
ADReC (Drug categories with the similar adverse drug reaction)	Breast Enlargement	1	0.0149254	29.5433	0.0332904	1	0.0525
ADReC (Drug categories with the similar adverse drug reaction)	Bronchitis	1	0.00389105	7.70195	0.121791	1	0.1304
ADReC (Drug categories with the similar adverse drug reaction)	Bronchospasm	2	0.00884956	17.5168	0.00601974	1	0.0223
ADReC (Drug categories with the similar adverse drug reaction)	Candida Albicans Infection	1	0.2	395.88	0.00252347	1	0.0164
ADReC (Drug categories with the similar adverse drug reaction)	Candidiasis	1	0.00649351	12.8532	0.07487	1	0.0908
ADReC (Drug categories with the similar adverse drug reaction)	Cardiac Disorder	1	0.00584795	11.5754	0.0827834	1	0.0973
ADReC (Drug categories with the similar adverse drug reaction)	Cardiac Fibrillation	1	0.00555556	10.9967	0.0869454	1	0.1008
ADReC (Drug categories with the similar adverse drug reaction)	Cataract	1	0.00719424	14.2403	0.0678309	1	0.0841
ADReC (Drug categories with the similar adverse drug reaction)	Cellulitis Gangrenous	1	0.25	494.85	0.00201928	1	0.0164
ADReC (Drug categories with the similar adverse drug reaction)	Cerebrovascular Accident	1	0.00549451	10.8758	0.0878677	1	0.1012
ADReC (Drug categories with the similar adverse drug reaction)	Chest Pain	2	0.00426439	8.44094	0.0239704	1	0.0436
ADReC (Drug categories with the similar adverse drug reaction)	Cholestasis	1	0.0125	24.7425	0.0396203	1	0.0591
ADReC (Drug categories with the similar adverse drug reaction)	Confusional State	3	0.00659341	13.051	0.00169593	1	0.0163
ADReC (Drug categories with the similar adverse drug reaction)	Conjunctivitis	1	0.00337838	6.68716	0.138929	1	0.1453
ADReC (Drug categories with the similar adverse drug reaction)	Constipation	2	0.0034965	6.92098	0.0344786	1	0.0539
ADReC (Drug categories with the similar adverse drug reaction)	Contusion	1	0.0163934	32.4492	0.0303549	1	0.0494
ADReC (Drug categories with the similar adverse drug reaction)	Convulsion	1	0.00220751	4.36954	0.204604	1	0.208
ADReC (Drug categories with the similar adverse drug reaction)	Coordination Abnormal	1	0.0070922	14.0383	0.0687725	1	0.085
ADReC (Drug categories with the similar adverse drug reaction)	Cough	1	0.0021322	4.22047	0.211009	1	0.213
ADReC (Drug categories with the similar adverse drug reaction)	Cough Increased	1	0.00735294	14.5544	0.0664167	1	0.0828
ADReC (Drug categories with the similar adverse drug reaction)	Crohn'S Disease	1	0.142857	282.771	0.00353107	1	0.0184
ADReC (Drug categories with the similar adverse drug reaction)	Cushingoid	1	0.0526316	104.179	0.00955535	1	0.0279
ADReC (Drug categories with the similar adverse drug reaction)	Deafness	1	0.00549451	10.8758	0.0878677	1	0.1012
ADReC (Drug categories with the similar adverse drug reaction)	Decreased Appetite	3	0.00587084	11.6207	0.00235413	1	0.0164
ADReC (Drug categories with the similar adverse drug reaction)	Depression	2	0.00490196	9.70294	0.0185042	1	0.0377
ADReC (Drug categories with the similar adverse drug reaction)	Dermatitis	3	0.00388601	7.69197	0.00737727	1	0.025
ADReC (Drug categories with the similar adverse drug reaction)	Dermatitis Contact	1	0.00819672	16.2246	0.0597885	1	0.0778
ADReC (Drug categories with the similar adverse drug reaction)	Dermatitis Exfoliative	1	0.00555556	10.9967	0.0869454	1	0.1008
ADReC (Drug categories with the similar adverse drug reaction)	Diarrhoea	3	0.00371747	7.35836	0.00831892	1	0.0264
ADReC (Drug categories with the similar adverse drug reaction)	Discomfort	1	0.00215983	4.27516	0.208613	1	0.2111
ADReC (Drug categories with the similar adverse drug reaction)	Disorientation	2	0.0152672	30.2198	0.00208112	1	0.0164
ADReC (Drug categories with the similar adverse drug reaction)	Disturbance In Attention	1	0.00943396	18.6736	0.0521558	1	0.0705
ADReC (Drug categories with the similar adverse drug reaction)	Disturbance In Sexual Arousal	1	0.00613497	12.1436	0.0790679	1	0.0942
ADReC (Drug categories with the similar adverse drug reaction)	Dizziness	3	0.00362757	7.18041	0.00888715	1	0.027
ADReC (Drug categories with the similar adverse drug reaction)	Drug Fever	1	0.030303	59.9818	0.0165377	1	0.0352
ADReC (Drug categories with the similar adverse drug reaction)	Drug Rash With Eosinophilia And Systemic Symptoms	1	0.0714286	141.386	0.00704967	1	0.0241
ADReC (Drug categories with the similar adverse drug reaction)	Dry Mouth	2	0.00417537	8.26472	0.0249222	1	0.0444
ADReC (Drug categories with the similar adverse drug reaction)	Dysgeusia	2	0.00531915	10.5287	0.0158796	1	0.0349
ADReC (Drug categories with the similar adverse drug reaction)	Dyskinesia	1	0.00909091	17.9945	0.0540697	1	0.0722
ADReC (Drug categories with the similar adverse drug reaction)	Dyspepsia	3	0.00557621	11.0375	0.00272051	1	0.0168
ADReC (Drug categories with the similar adverse drug reaction)	Dysphonia	1	0.00806452	15.9629	0.0607382	1	0.0784
ADReC (Drug categories with the similar adverse drug reaction)	Dyspnoea	2	0.00344234	6.81377	0.0354681	1	0.0548
ADReC (Drug categories with the similar adverse drug reaction)	Dysuria	2	0.00749064	14.827	0.00829361	1	0.0264
ADReC (Drug categories with the similar adverse drug reaction)	Ear Disorder	1	0.0185185	36.6556	0.0269189	1	0.0461
ADReC (Drug categories with the similar adverse drug reaction)	Ear Infection	1	0.00847458	16.7746	0.0578861	1	0.0759
ADReC (Drug categories with the similar adverse drug reaction)	Ear Pain	1	0.00595238	11.7821	0.0813919	1	0.0958
ADReC (Drug categories with the similar adverse drug reaction)	Ecchymosis	1	0.00636943	12.6076	0.0762714	1	0.0921
ADReC (Drug categories with the similar adverse drug reaction)	Eczema	1	0.00621118	12.2944	0.0781367	1	0.0939
ADReC (Drug categories with the similar adverse drug reaction)	Ejaculation Disorder	1	0.0188679	37.3472	0.0264271	1	0.046
ADReC (Drug categories with the similar adverse drug reaction)	Electroencephalogram Abnormal	1	0.0263158	52.0895	0.0190194	1	0.0384
ADReC (Drug categories with the similar adverse drug reaction)	Enteritis	1	0.0333333	65.98	0.0150456	1	0.0346
ADReC (Drug categories with the similar adverse drug reaction)	Eosinophilia	1	0.00438596	8.68158	0.108826	1	0.1181
ADReC (Drug categories with the similar adverse drug reaction)	Epidermal Necrosis	1	0.030303	59.9818	0.0165377	1	0.0352
ADReC (Drug categories with the similar adverse drug reaction)	Epistaxis	1	0.00341297	6.75563	0.137622	1	0.1441
ADReC (Drug categories with the similar adverse drug reaction)	Erectile Dysfunction	1	0.004	7.9176	0.118679	1	0.1274
ADReC (Drug categories with the similar adverse drug reaction)	Eructation	1	0.00769231	15.2262	0.0635818	1	0.0809
ADReC (Drug categories with the similar adverse drug reaction)	Erythema	1	0.00210084	4.1584	0.213795	1	0.2155
ADReC (Drug categories with the similar adverse drug reaction)	Erythema Multiforme	1	0.00408163	8.07918	0.116449	1	0.1254
ADReC (Drug categories with the similar adverse drug reaction)	External Ear Disorder	1	0.333333	659.8	0.00151485	1	0.0159
ADReC (Drug categories with the similar adverse drug reaction)	Extrapyramidal Disorder	1	0.0114942	22.7517	0.0430114	1	0.062
ADReC (Drug categories with the similar adverse drug reaction)	Eye Disorder	1	0.0227273	44.9864	0.0219892	1	0.0409
ADReC (Drug categories with the similar adverse drug reaction)	Eye Infection	1	0.0384615	76.1308	0.0130527	1	0.0319
ADReC (Drug categories with the similar adverse drug reaction)	Face Oedema	1	0.00454545	8.99727	0.105216	1	0.1149
ADReC (Drug categories with the similar adverse drug reaction)	Fasciitis	1	0.0909091	179.945	0.00554322	1	0.0219
ADReC (Drug categories with the similar adverse drug reaction)	Fatigue	3	0.00558659	11.0581	0.00270635	1	0.0168
ADReC (Drug categories with the similar adverse drug reaction)	Feeling Abnormal	3	0.00559701	11.0787	0.00269224	1	0.0168
ADReC (Drug categories with the similar adverse drug reaction)	Fistula	1	0.0909091	179.945	0.00554322	1	0.0219
ADReC (Drug categories with the similar adverse drug reaction)	Flatulence	3	0.00867052	17.1624	0.00077531	0.6706	0.0149
ADReC (Drug categories with the similar adverse drug reaction)	Flushing	2	0.00569801	11.2786	0.0139507	1	0.0335
ADReC (Drug categories with the similar adverse drug reaction)	Fracture	1	0.030303	59.9818	0.0165377	1	0.0352
ADReC (Drug categories with the similar adverse drug reaction)	Galactorrhoea	1	0.0151515	29.9909	0.0328018	1	0.0519
ADReC (Drug categories with the similar adverse drug reaction)	Gastritis	1	0.00436681	8.64367	0.109276	1	0.1185
ADReC (Drug categories with the similar adverse drug reaction)	Gastroenteritis	1	0.00543478	10.7576	0.0887891	1	0.1016
ADReC (Drug categories with the similar adverse drug reaction)	Gastroenteritis Viral	1	0.1	197.94	0.00504057	1	0.021
ADReC (Drug categories with the similar adverse drug reaction)	Gastrointestinal Fistula	1	0.25	494.85	0.00201928	1	0.0164
ADReC (Drug categories with the similar adverse drug reaction)	Gastrointestinal Haemorrhage	1	0.00507614	10.0477	0.0947555	1	0.1058
ADReC (Drug categories with the similar adverse drug reaction)	Gastrointestinal Pain	3	0.00544465	10.7771	0.00290871	1	0.0174
ADReC (Drug categories with the similar adverse drug reaction)	Gastrointestinal Perforation	1	0.0344828	68.2552	0.0145477	1	0.0341
ADReC (Drug categories with the similar adverse drug reaction)	Glaucoma	1	0.0111111	21.9933	0.0444611	1	0.063
ADReC (Drug categories with the similar adverse drug reaction)	Glossitis	1	0.00806452	15.9629	0.0607382	1	0.0784
ADReC (Drug categories with the similar adverse drug reaction)	Gravitational Oedema	1	0.0588235	116.435	0.00855384	1	0.0264
ADReC (Drug categories with the similar adverse drug reaction)	Growth Retardation	1	0.04	79.176	0.0125538	1	0.0316
ADReC (Drug categories with the similar adverse drug reaction)	Haematuria	2	0.00714286	14.1386	0.00908308	1	0.027
ADReC (Drug categories with the similar adverse drug reaction)	Haemoglobin	2	0.00540541	10.6995	0.0154068	1	0.0346
ADReC (Drug categories with the similar adverse drug reaction)	Haemolytic Anaemia	1	0.00552486	10.9359	0.0874067	1	0.1011
ADReC (Drug categories with the similar adverse drug reaction)	Haemorrhage	2	0.00470588	9.31482	0.0199677	1	0.0386
ADReC (Drug categories with the similar adverse drug reaction)	Haemorrhoids	1	0.0133333	26.392	0.0371906	1	0.0565
ADReC (Drug categories with the similar adverse drug reaction)	Hair Growth Abnormal	1	0.111111	219.933	0.00453765	1	0.0207
ADReC (Drug categories with the similar adverse drug reaction)	Hallucination	2	0.00694444	13.7458	0.00958493	1	0.0279
ADReC (Drug categories with the similar adverse drug reaction)	Headache	3	0.00326797	6.46863	0.0117545	1	0.0304
ADReC (Drug categories with the similar adverse drug reaction)	Hearing Impaired	1	0.00819672	16.2246	0.0597885	1	0.0778
ADReC (Drug categories with the similar adverse drug reaction)	Hepatic Function Abnormal	2	0.00787402	15.5858	0.00753679	1	0.0252
ADReC (Drug categories with the similar adverse drug reaction)	Hepatitis	2	0.00619195	12.2563	0.0119212	1	0.0306
ADReC (Drug categories with the similar adverse drug reaction)	Herpes Simplex	1	0.00833333	16.495	0.0588378	1	0.0769
ADReC (Drug categories with the similar adverse drug reaction)	Herpes Virus Infection	1	0.00724638	14.3435	0.0673597	1	0.0837
ADReC (Drug categories with the similar adverse drug reaction)	Hirsutism	1	0.0151515	29.9909	0.0328018	1	0.0519
ADReC (Drug categories with the similar adverse drug reaction)	Hyperadrenocorticism	1	0.1	197.94	0.00504057	1	0.021
ADReC (Drug categories with the similar adverse drug reaction)	Hyperhidrosis	3	0.00608519	12.045	0.00212788	1	0.0164
ADReC (Drug categories with the similar adverse drug reaction)	Hyperkinesia	1	0.00613497	12.1436	0.0790679	1	0.0942
ADReC (Drug categories with the similar adverse drug reaction)	Hypersensitivity	2	0.00312012	6.17598	0.0423369	1	0.0615
ADReC (Drug categories with the similar adverse drug reaction)	Hypertension	2	0.00398406	7.88606	0.0271687	1	0.0464
ADReC (Drug categories with the similar adverse drug reaction)	Hyperthermia	1	0.0357143	70.6929	0.0140496	1	0.0336
ADReC (Drug categories with the similar adverse drug reaction)	Hypertonia	1	0.00609756	12.0695	0.0795332	1	0.0945
ADReC (Drug categories with the similar adverse drug reaction)	Hypertrophy	1	0.00763359	15.1099	0.0640548	1	0.0811
ADReC (Drug categories with the similar adverse drug reaction)	Hypoaesthesia	1	0.003367	6.66465	0.139364	1	0.1456
ADReC (Drug categories with the similar adverse drug reaction)	Hypokalaemia	1	0.00526316	10.4179	0.0915477	1	0.1039
ADReC (Drug categories with the similar adverse drug reaction)	Hypomania	1	0.0526316	104.179	0.00955535	1	0.0279
ADReC (Drug categories with the similar adverse drug reaction)	Hypotension	1	0.00178253	3.52834	0.246849	1	0.2471
ADReC (Drug categories with the similar adverse drug reaction)	Ileus	1	0.010101	19.9939	0.048797	1	0.0673
ADReC (Drug categories with the similar adverse drug reaction)	Ileus Paralytic	1	0.025	49.485	0.0200103	1	0.0386
ADReC (Drug categories with the similar adverse drug reaction)	Ill-Defined Disorder	1	0.00265957	5.26436	0.173045	1	0.1767
ADReC (Drug categories with the similar adverse drug reaction)	Immunosuppression	1	0.0588235	116.435	0.00855384	1	0.0264
ADReC (Drug categories with the similar adverse drug reaction)	Impaired Healing	1	0.0212766	42.1149	0.0234707	1	0.0427
ADReC (Drug categories with the similar adverse drug reaction)	Impotence	1	0.00606061	11.9964	0.0799982	1	0.0947
ADReC (Drug categories with the similar adverse drug reaction)	Inappropriate Antidiuretic Hormone Secretion	1	0.0227273	44.9864	0.0219892	1	0.0409
ADReC (Drug categories with the similar adverse drug reaction)	Increased Appetite	2	0.0115607	22.8832	0.00358551	1	0.0185
ADReC (Drug categories with the similar adverse drug reaction)	Increased Tendency To Bruise	1	0.1	197.94	0.00504057	1	0.021
ADReC (Drug categories with the similar adverse drug reaction)	Infarction	1	0.00460829	9.12166	0.103858	1	0.1139
ADReC (Drug categories with the similar adverse drug reaction)	Infection	1	0.0021322	4.22047	0.211009	1	0.213
ADReC (Drug categories with the similar adverse drug reaction)	Influenza	1	0.00332226	6.57608	0.141102	1	0.1471
ADReC (Drug categories with the similar adverse drug reaction)	Influenza Like Illness	1	0.00925926	18.3278	0.0531132	1	0.0712
ADReC (Drug categories with the similar adverse drug reaction)	Insomnia	3	0.00517241	10.2383	0.00335685	1	0.0184
ADReC (Drug categories with the similar adverse drug reaction)	Intestinal Obstruction	1	0.0126582	25.0557	0.0391348	1	0.0586
ADReC (Drug categories with the similar adverse drug reaction)	Intracranial Pressure Increased	1	0.0196078	38.8118	0.0254426	1	0.0448
ADReC (Drug categories with the similar adverse drug reaction)	Intraocular Pressure Increased	1	0.0185185	36.6556	0.0269189	1	0.0461
ADReC (Drug categories with the similar adverse drug reaction)	Irritability	1	0.00617284	12.2185	0.0786024	1	0.0942
ADReC (Drug categories with the similar adverse drug reaction)	Jaundice	2	0.00668896	13.2401	0.0102947	1	0.0289
ADReC (Drug categories with the similar adverse drug reaction)	Joint Swelling	1	0.027027	53.4973	0.0185235	1	0.0377
ADReC (Drug categories with the similar adverse drug reaction)	Lacrimation Increased	1	0.00671141	13.2846	0.0725296	1	0.0884
ADReC (Drug categories with the similar adverse drug reaction)	Leukocytoclastic Vasculitis	1	0.0217391	43.0304	0.0229771	1	0.0424
ADReC (Drug categories with the similar adverse drug reaction)	Leukocytosis	1	0.00862069	17.0638	0.0569334	1	0.0751
ADReC (Drug categories with the similar adverse drug reaction)	Leukopenia	1	0.00217391	4.30304	0.207412	1	0.2101
ADReC (Drug categories with the similar adverse drug reaction)	Libido Decreased	1	0.00561798	11.1202	0.0860222	1	0.1001
ADReC (Drug categories with the similar adverse drug reaction)	Libido Disorder	1	0.0212766	42.1149	0.0234707	1	0.0427
ADReC (Drug categories with the similar adverse drug reaction)	Lipohypertrophy	1	0.0555556	109.967	0.00905472	1	0.027
ADReC (Drug categories with the similar adverse drug reaction)	Liver Function Test Abnormal	1	0.0047619	9.42571	0.100683	1	0.1114
ADReC (Drug categories with the similar adverse drug reaction)	Loss Of Consciousness	3	0.00797872	15.7931	0.0009845	0.8516	0.0149
ADReC (Drug categories with the similar adverse drug reaction)	Lymphadenopathy	1	0.00543478	10.7576	0.0887891	1	0.1016
ADReC (Drug categories with the similar adverse drug reaction)	Malaise	1	0.0022779	4.50888	0.198957	1	0.2025
ADReC (Drug categories with the similar adverse drug reaction)	Menstrual Disorder	1	0.0107527	21.2839	0.0459086	1	0.0646
ADReC (Drug categories with the similar adverse drug reaction)	Menstruation Irregular	1	0.0166667	32.99	0.0298648	1	0.0491
ADReC (Drug categories with the similar adverse drug reaction)	Mental Disability	1	0.00746269	14.7716	0.0654726	1	0.0818
ADReC (Drug categories with the similar adverse drug reaction)	Metrorrhagia	1	0.0117647	23.2871	0.0420437	1	0.0612
ADReC (Drug categories with the similar adverse drug reaction)	Micturition Disorder	1	0.02	39.588	0.02495	1	0.0444
ADReC (Drug categories with the similar adverse drug reaction)	Migraine	1	0.00507614	10.0477	0.0947555	1	0.1058
ADReC (Drug categories with the similar adverse drug reaction)	Mood Swings	1	0.0060241	11.9241	0.080463	1	0.095
ADReC (Drug categories with the similar adverse drug reaction)	Mucosal Dryness	1	0.2	395.88	0.00252347	1	0.0164
ADReC (Drug categories with the similar adverse drug reaction)	Mucous Membrane Disorder	1	0.027027	53.4973	0.0185235	1	0.0377
ADReC (Drug categories with the similar adverse drug reaction)	Muscle Spasms	2	0.00488998	9.67922	0.018589	1	0.0377
ADReC (Drug categories with the similar adverse drug reaction)	Muscular Weakness	1	0.003125	6.18562	0.149309	1	0.1549
ADReC (Drug categories with the similar adverse drug reaction)	Musculoskeletal Discomfort	1	0.00217865	4.31242	0.207012	1	0.2099
ADReC (Drug categories with the similar adverse drug reaction)	Myalgia	1	0.00209644	4.14969	0.214192	1	0.2157
ADReC (Drug categories with the similar adverse drug reaction)	Mydriasis	1	0.0108696	21.5152	0.0454263	1	0.064
ADReC (Drug categories with the similar adverse drug reaction)	Myocardial Infarction	1	0.00374532	7.41348	0.126217	1	0.1345
ADReC (Drug categories with the similar adverse drug reaction)	Nasal Congestion	2	0.0118343	23.4249	0.00342573	1	0.0184
ADReC (Drug categories with the similar adverse drug reaction)	Nasal Discomfort	1	0.0434783	86.0609	0.0115553	1	0.0302
ADReC (Drug categories with the similar adverse drug reaction)	Nasal Irritation	1	0.0714286	141.386	0.00704967	1	0.0241
ADReC (Drug categories with the similar adverse drug reaction)	Nasal Septum Perforation	1	0.1	197.94	0.00504057	1	0.021
ADReC (Drug categories with the similar adverse drug reaction)	Nasopharyngitis	1	0.00483092	9.56232	0.0993185	1	0.1103
ADReC (Drug categories with the similar adverse drug reaction)	Nausea	3	0.00311203	6.15996	0.0133825	1	0.0325
ADReC (Drug categories with the similar adverse drug reaction)	Neck Pain	1	0.00787402	15.5858	0.0621611	1	0.0797
ADReC (Drug categories with the similar adverse drug reaction)	Necrosis	1	0.00581395	11.5081	0.0832468	1	0.0977
ADReC (Drug categories with the similar adverse drug reaction)	Necrosis Ischaemic	1	0.142857	282.771	0.00353107	1	0.0184
ADReC (Drug categories with the similar adverse drug reaction)	Necrotising Fasciitis	1	0.2	395.88	0.00252347	1	0.0164
ADReC (Drug categories with the similar adverse drug reaction)	Nephritis	1	0.0116279	23.0163	0.0425277	1	0.0615
ADReC (Drug categories with the similar adverse drug reaction)	Nephrotic Syndrome	1	0.0196078	38.8118	0.0254426	1	0.0448
ADReC (Drug categories with the similar adverse drug reaction)	Nervousness	3	0.00815217	16.1364	0.00092561	0.8006	0.0149
ADReC (Drug categories with the similar adverse drug reaction)	Neuroleptic Malignant Syndrome	1	0.0222222	43.9867	0.0224833	1	0.0416
ADReC (Drug categories with the similar adverse drug reaction)	Nightmare	1	0.00934579	18.4991	0.0526346	1	0.0708
ADReC (Drug categories with the similar adverse drug reaction)	Nocturia	1	0.00847458	16.7746	0.0578861	1	0.0759
ADReC (Drug categories with the similar adverse drug reaction)	Obstruction	1	0.00826446	16.3587	0.0593132	1	0.0774
ADReC (Drug categories with the similar adverse drug reaction)	Oedema	3	0.00472441	9.3515	0.00431745	1	0.0206
ADReC (Drug categories with the similar adverse drug reaction)	Oedema Peripheral	1	0.0030581	6.05321	0.152313	1	0.1578
ADReC (Drug categories with the similar adverse drug reaction)	Oral Candidiasis	1	0.0131579	26.0447	0.037677	1	0.057
ADReC (Drug categories with the similar adverse drug reaction)	Oropharyngeal Discomfort	1	0.0136986	27.1151	0.0362171	1	0.0555
ADReC (Drug categories with the similar adverse drug reaction)	Oropharyngeal Pain	1	0.00613497	12.1436	0.0790679	1	0.0942
ADReC (Drug categories with the similar adverse drug reaction)	Osteonecrosis	1	0.0285714	56.5543	0.0175311	1	0.0365
ADReC (Drug categories with the similar adverse drug reaction)	Osteoporosis	1	0.0172414	34.1276	0.0288839	1	0.0485
ADReC (Drug categories with the similar adverse drug reaction)	Otitis Externa	1	0.0285714	56.5543	0.0175311	1	0.0365
ADReC (Drug categories with the similar adverse drug reaction)	Otitis Media	1	0.01	19.794	0.0492776	1	0.0678
ADReC (Drug categories with the similar adverse drug reaction)	Pain	2	0.00262812	5.2021	0.0573905	1	0.0755
ADReC (Drug categories with the similar adverse drug reaction)	Palpitations	3	0.00742574	14.6985	0.00120912	1	0.0159
ADReC (Drug categories with the similar adverse drug reaction)	Pancreatitis	1	0.0037037	7.33111	0.127541	1	0.1355
ADReC (Drug categories with the similar adverse drug reaction)	Paraesthesia	3	0.00537634	10.6419	0.00301328	1	0.0174
ADReC (Drug categories with the similar adverse drug reaction)	Paresthesia Of Limbs	1	0.25	494.85	0.00201928	1	0.0164
ADReC (Drug categories with the similar adverse drug reaction)	Parotid Gland Enlargement	1	0.0454546	89.9727	0.0110557	1	0.0295
ADReC (Drug categories with the similar adverse drug reaction)	Peptic Ulcer	1	0.0138889	27.4917	0.0357299	1	0.0551
ADReC (Drug categories with the similar adverse drug reaction)	Petechiae	1	0.00934579	18.4991	0.0526346	1	0.0708
ADReC (Drug categories with the similar adverse drug reaction)	Pharyngeal Disorder	1	0.125	247.425	0.00403449	1	0.0196
ADReC (Drug categories with the similar adverse drug reaction)	Pharyngeal Oedema	1	0.0476191	94.2571	0.0105559	1	0.0289
ADReC (Drug categories with the similar adverse drug reaction)	Pharyngitis	1	0.00289017	5.72081	0.160413	1	0.1648
ADReC (Drug categories with the similar adverse drug reaction)	Photosensitivity Reaction	2	0.00735294	14.5544	0.00859342	1	0.0264
ADReC (Drug categories with the similar adverse drug reaction)	Pollakiuria	2	0.00790514	15.6474	0.00747993	1	0.0252
ADReC (Drug categories with the similar adverse drug reaction)	Product Taste Abnormal	1	0.142857	282.771	0.00353107	1	0.0184
ADReC (Drug categories with the similar adverse drug reaction)	Protein Urine Present	1	0.0117647	23.2871	0.0420437	1	0.0612
ADReC (Drug categories with the similar adverse drug reaction)	Proteinuria	1	0.00990099	19.598	0.0497579	1	0.0681
ADReC (Drug categories with the similar adverse drug reaction)	Pruritus	3	0.00391645	7.75222	0.00722253	1	0.0246
ADReC (Drug categories with the similar adverse drug reaction)	Psychiatric Symptom	1	0.1	197.94	0.00504057	1	0.021
ADReC (Drug categories with the similar adverse drug reaction)	Psychotic Disorder	1	0.00512821	10.1508	0.0938402	1	0.1054
ADReC (Drug categories with the similar adverse drug reaction)	Purpura	2	0.00869565	17.2122	0.00622688	1	0.0228
ADReC (Drug categories with the similar adverse drug reaction)	Pyrexia	2	0.00362976	7.18475	0.0322131	1	0.0514
ADReC (Drug categories with the similar adverse drug reaction)	Pyuria	1	0.03125	61.8563	0.0160406	1	0.0349
ADReC (Drug categories with the similar adverse drug reaction)	Rash	3	0.00334076	6.61269	0.0110843	1	0.0295
ADReC (Drug categories with the similar adverse drug reaction)	Rash Pustular	1	0.0121951	24.139	0.0405904	1	0.06
ADReC (Drug categories with the similar adverse drug reaction)	Red Blood Cell Sedimentation Rate Increased	1	0.0333333	65.98	0.0150456	1	0.0346
ADReC (Drug categories with the similar adverse drug reaction)	Renal Failure	1	0.00331126	6.5543	0.141536	1	0.1473
ADReC (Drug categories with the similar adverse drug reaction)	Renal Impairment	1	0.00632911	12.5278	0.0767381	1	0.0926
ADReC (Drug categories with the similar adverse drug reaction)	Respiratory Disorder	1	0.00680272	13.4653	0.0715917	1	0.0877
ADReC (Drug categories with the similar adverse drug reaction)	Respiratory Tract Infection	1	0.00434783	8.60609	0.109726	1	0.1186
ADReC (Drug categories with the similar adverse drug reaction)	Restlessness	2	0.0181818	35.9891	0.00147556	1	0.0159
ADReC (Drug categories with the similar adverse drug reaction)	Rhinitis	1	0.00294118	5.82176	0.157863	1	0.1628
ADReC (Drug categories with the similar adverse drug reaction)	Rhinitis Allergic	1	0.0625	123.713	0.0080527	1	0.0263
ADReC (Drug categories with the similar adverse drug reaction)	Rhinitis Perennial	1	0.2	395.88	0.00252347	1	0.0164
ADReC (Drug categories with the similar adverse drug reaction)	Scab	1	0.0344828	68.2552	0.0145477	1	0.0341
ADReC (Drug categories with the similar adverse drug reaction)	Secondary Adrenocortical Insufficiency	1	0.0909091	179.945	0.00554322	1	0.0219
ADReC (Drug categories with the similar adverse drug reaction)	Sensory Loss	1	0.0111111	21.9933	0.0444611	1	0.063
ADReC (Drug categories with the similar adverse drug reaction)	Shock	3	0.00680272	13.4653	0.00155196	1	0.016
ADReC (Drug categories with the similar adverse drug reaction)	Sinusitis	1	0.00316456	6.26392	0.147587	1	0.1533
ADReC (Drug categories with the similar adverse drug reaction)	Skin Disorder	1	0.00574713	11.3759	0.0841728	1	0.0983
ADReC (Drug categories with the similar adverse drug reaction)	Skin Irritation	1	0.0119048	23.5643	0.0415595	1	0.0608
ADReC (Drug categories with the similar adverse drug reaction)	Skin Striae	1	0.0322581	63.8516	0.0155432	1	0.0346
ADReC (Drug categories with the similar adverse drug reaction)	Sleep Disorder	1	0.00704225	13.9394	0.069243	1	0.0853
ADReC (Drug categories with the similar adverse drug reaction)	Somnolence	3	0.00535714	10.6039	0.00304357	1	0.0174
ADReC (Drug categories with the similar adverse drug reaction)	Stevens-Johnson Syndrome	1	0.00465116	9.20651	0.102952	1	0.1132
ADReC (Drug categories with the similar adverse drug reaction)	Stomatitis	1	0.00342466	6.77877	0.137186	1	0.1438
ADReC (Drug categories with the similar adverse drug reaction)	Stridor	1	0.0277778	54.9833	0.0180275	1	0.037
ADReC (Drug categories with the similar adverse drug reaction)	Stroke	1	0.0243902	48.278	0.0205054	1	0.0394
ADReC (Drug categories with the similar adverse drug reaction)	Swelling	2	0.00884956	17.5168	0.00601974	1	0.0223
ADReC (Drug categories with the similar adverse drug reaction)	Syncope	3	0.00726392	14.3782	0.00128759	1	0.0159
ADReC (Drug categories with the similar adverse drug reaction)	Tachycardia	2	0.00390625	7.73203	0.02817	1	0.0478
ADReC (Drug categories with the similar adverse drug reaction)	Tardive Dyskinesia	1	0.0277778	54.9833	0.0180275	1	0.037
ADReC (Drug categories with the similar adverse drug reaction)	Tenderness	1	0.00641026	12.6885	0.0758045	1	0.0917
ADReC (Drug categories with the similar adverse drug reaction)	Tension	3	0.00909091	17.9945	0.00067643	0.5851	0.0136
ADReC (Drug categories with the similar adverse drug reaction)	Testicular Swelling	1	0.0769231	152.262	0.00654778	1	0.0231
ADReC (Drug categories with the similar adverse drug reaction)	Throat Irritation	1	0.025	49.485	0.0200103	1	0.0386
ADReC (Drug categories with the similar adverse drug reaction)	Thrombocytopenia	2	0.00380228	7.52624	0.0295963	1	0.0491
ADReC (Drug categories with the similar adverse drug reaction)	Tinnitus	2	0.0058651	11.6094	0.0132098	1	0.0322
ADReC (Drug categories with the similar adverse drug reaction)	Tongue Disorder	1	0.0120482	23.8482	0.0410751	1	0.0605
ADReC (Drug categories with the similar adverse drug reaction)	Tongue Oedema	1	0.0147059	29.1088	0.0337788	1	0.0531
ADReC (Drug categories with the similar adverse drug reaction)	Tooth Disorder	1	0.012987	25.7065	0.0381632	1	0.0575
ADReC (Drug categories with the similar adverse drug reaction)	Toxic Epidermal Necrolysis	1	0.0045045	8.91622	0.10612	1	0.1156
ADReC (Drug categories with the similar adverse drug reaction)	Tremor	2	0.00506329	10.0223	0.0174172	1	0.0365
ADReC (Drug categories with the similar adverse drug reaction)	Tubulointerstitial Nephritis	1	0.0113636	22.4932	0.0434949	1	0.0623
ADReC (Drug categories with the similar adverse drug reaction)	Type Iv Hypersensitivity Reaction	1	0.111111	219.933	0.00453765	1	0.0207
ADReC (Drug categories with the similar adverse drug reaction)	Ulcer	2	0.00749064	14.827	0.00829361	1	0.0264
ADReC (Drug categories with the similar adverse drug reaction)	Upper Respiratory Tract Infection	1	0.00347222	6.87292	0.135441	1	0.1425
ADReC (Drug categories with the similar adverse drug reaction)	Urinary Retention	1	0.00480769	9.51635	0.0997735	1	0.1105
ADReC (Drug categories with the similar adverse drug reaction)	Urinary Tract Infection	1	0.00344828	6.82552	0.136314	1	0.1431
ADReC (Drug categories with the similar adverse drug reaction)	Urticaria	3	0.0044843	8.87623	0.00498618	1	0.021
ADReC (Drug categories with the similar adverse drug reaction)	Vascular Purpura	2	0.00980392	19.4059	0.00493859	1	0.021
ADReC (Drug categories with the similar adverse drug reaction)	Vasculitis	2	0.0124224	24.5888	0.00311649	1	0.0177
ADReC (Drug categories with the similar adverse drug reaction)	Vertigo	2	0.00473934	9.38104	0.019706	1	0.0386
ADReC (Drug categories with the similar adverse drug reaction)	Viral Diarrhoea	1	0.0476191	94.2571	0.0105559	1	0.0289
ADReC (Drug categories with the similar adverse drug reaction)	Viral Infection	1	0.00884956	17.5168	0.0555027	1	0.0735
ADReC (Drug categories with the similar adverse drug reaction)	Viral Upper Respiratory Tract Infection	1	0.5	989.7	0.00101015	0.8738	0.0149
ADReC (Drug categories with the similar adverse drug reaction)	Vision Blurred	3	0.00789474	15.6268	0.00101482	0.8778	0.0149
ADReC (Drug categories with the similar adverse drug reaction)	Visual Acuity Reduced	1	0.00473934	9.38104	0.101137	1	0.1116
ADReC (Drug categories with the similar adverse drug reaction)	Visual Disturbance	1	0.00746269	14.7716	0.0654726	1	0.0818
ADReC (Drug categories with the similar adverse drug reaction)	Visual Impairment	2	0.00617284	12.2185	0.0119912	1	0.0307
ADReC (Drug categories with the similar adverse drug reaction)	Voice Alteration	1	0.0227273	44.9864	0.0219892	1	0.0409
ADReC (Drug categories with the similar adverse drug reaction)	Vomiting	3	0.00341297	6.75563	0.0104686	1	0.0289
ADReC (Drug categories with the similar adverse drug reaction)	Weight Abnormal	1	0.030303	59.9818	0.0165377	1	0.0352
ADReC (Drug categories with the similar adverse drug reaction)	Weight Decreased	1	0.00324675	6.42662	0.144134	1	0.1499
ADReC (Drug categories with the similar adverse drug reaction)	Weight Increased	2	0.00746269	14.7716	0.00835319	1	0.0264
ADReC (Drug categories with the similar adverse drug reaction)	Wheezing	1	0.008	15.8352	0.0612128	1	0.0788
ATC (Drug categories with the same anatomical therapeutic chemical classifications)	ANALGESICS	1	0.0238095	47.1286	0.0210003	1	0.04
ATC (Drug categories with the same anatomical therapeutic chemical classifications)	ANTIDIARRHEALS, INTESTINAL ANTIINFLAMMATORY/ANTIINFECTIVE AGENTS	1	0.0322581	63.8516	0.0155432	1	0.0346
ATC (Drug categories with the same anatomical therapeutic chemical classifications)	ANTIHISTAMINES FOR SYSTEMIC USE	1	0.0277778	54.9833	0.0180275	1	0.037
ATC (Drug categories with the same anatomical therapeutic chemical classifications)	CORTICOSTEROIDS, DERMATOLOGICAL PREPARATIONS	1	0.0454546	89.9727	0.0110557	1	0.0295
ATC (Drug categories with the same anatomical therapeutic chemical classifications)	DRUGS FOR OBSTRUCTIVE AIRWAY DISEASES	1	0.025	49.485	0.0200103	1	0.0386
ATC (Drug categories with the same anatomical therapeutic chemical classifications)	NASAL PREPARATIONS	1	0.030303	59.9818	0.0165377	1	0.0352
ATC (Drug categories with the same anatomical therapeutic chemical classifications)	PSYCHOANALEPTICS	1	0.0181818	35.9891	0.0274105	1	0.0468
Category (Drug categories with the same therapeutic or general categories)	Adrenergic Uptake Inhibitors	1	0.0555556	109.967	0.00905472	1	0.027
Category (Drug categories with the same therapeutic or general categories)	Anti-Inflammatory Agents, Non-Steroidal	1	0.0222222	43.9867	0.0224833	1	0.0416
Category (Drug categories with the same therapeutic or general categories)	Antidepressive Agents, Second-Generation	1	0.0769231	152.262	0.00654778	1	0.0231
Category (Drug categories with the same therapeutic or general categories)	Antiemetics	1	0.0454546	89.9727	0.0110557	1	0.0295
Category (Drug categories with the same therapeutic or general categories)	Corticosteroids	1	0.0769231	152.262	0.00654778	1	0.0231
Category (Drug categories with the same therapeutic or general categories)	Dopamine Antagonists	1	0.04	79.176	0.0125538	1	0.0316
Category (Drug categories with the same therapeutic or general categories)	Histamine H1 Antagonists	1	0.0322581	63.8516	0.0155432	1	0.0346
Category (Drug categories with the same therapeutic or general categories)	Neurotransmitter Uptake Inhibitors	1	0.333333	659.8	0.00151485	1	0.0159
Category (Drug categories with the same therapeutic or general categories)	Serotonin Uptake Inhibitors	1	0.0588235	116.435	0.00855384	1	0.0264
Classification (Drug categories with the same chemical structure classifications)	Benzene and Substituted Derivatives	2	0.001443	2.85628	0.155763	1	0.161
Classification (Drug categories with the same chemical structure classifications)	Benzoxazepines	1	0.5	989.7	0.00101015	0.8738	0.0149
Classification (Drug categories with the same chemical structure classifications)	Steroids and Steroid Derivatives	1	0.00518135	10.256	0.0929239	1	0.1049
Disease (Drug categories with the same disease)	asthma	1	0.00961538	19.0327	0.0511973	1	0.0693
Disease (Drug categories with the same disease)	depression	1	0.0140845	27.8789	0.0352425	1	0.0545
Disease (Drug categories with the same disease)	nausea and vomiting	1	0.0625	123.713	0.0080527	1	0.0263
Disease (Drug categories with the same disease)	pain	1	0.0116279	23.0163	0.0425277	1	0.0615
Indications (Drug categories with the same indications)	Agitation	1	0.0153846	30.4523	0.0323129	1	0.0514
Indications (Drug categories with the same indications)	Anxiety	1	0.0232558	46.0326	0.0214949	1	0.0407
Indications (Drug categories with the same indications)	Arthritis	1	0.0192308	38.0654	0.025935	1	0.0452
Indications (Drug categories with the same indications)	Asthma	1	0.0144928	28.687	0.034267	1	0.0537
Indications (Drug categories with the same indications)	Breast cancer	1	0.0192308	38.0654	0.025935	1	0.0452
Indications (Drug categories with the same indications)	Colitis ulcerative	1	0.0476191	94.2571	0.0105559	1	0.0289
Indications (Drug categories with the same indications)	Crohn's disease	1	0.1	197.94	0.00504057	1	0.021
Indications (Drug categories with the same indications)	Depression	1	0.0384615	76.1308	0.0130527	1	0.0319
Indications (Drug categories with the same indications)	Depressive disorder	1	0.0625	123.713	0.0080527	1	0.0263
Indications (Drug categories with the same indications)	Depressive symptom	1	0.0833333	164.95	0.00604563	1	0.0223
Indications (Drug categories with the same indications)	Dysthymic disorder	1	0.0588235	116.435	0.00855384	1	0.0264
Indications (Drug categories with the same indications)	Inflammation	1	0.02	39.588	0.02495	1	0.0444
Indications (Drug categories with the same indications)	Malaise	1	0.0588235	116.435	0.00855384	1	0.0264
Indications (Drug categories with the same indications)	Meniere's disease	1	0.25	494.85	0.00201928	1	0.0164
Indications (Drug categories with the same indications)	Motion sickness	1	0.125	247.425	0.00403449	1	0.0196
Indications (Drug categories with the same indications)	Nasal polyps	1	0.25	494.85	0.00201928	1	0.0164
Indications (Drug categories with the same indications)	Nausea	1	0.0169491	33.5492	0.0293745	1	0.049
Indications (Drug categories with the same indications)	Osteoarthritis	1	0.025	49.485	0.0200103	1	0.0386
Indications (Drug categories with the same indications)	Pain	1	0.0113636	22.4932	0.0434949	1	0.0623
Indications (Drug categories with the same indications)	Perennial allergic rhinitis	1	0.05	98.97	0.0100557	1	0.0285
Indications (Drug categories with the same indications)	Postoperative vomiting	1	0.333333	659.8	0.00151485	1	0.0159
Indications (Drug categories with the same indications)	Procedural vomiting	1	0.333333	659.8	0.00151485	1	0.0159
Indications (Drug categories with the same indications)	Proctocolitis	1	0.05	98.97	0.0100557	1	0.0285
Indications (Drug categories with the same indications)	Psychotic disorder	1	0.0333333	65.98	0.0150456	1	0.0346
Indications (Drug categories with the same indications)	Regurgitation	1	0.2	395.88	0.00252347	1	0.0164
Indications (Drug categories with the same indications)	Rheumatoid arthritis	1	0.0212766	42.1149	0.0234707	1	0.0427
Indications (Drug categories with the same indications)	Rhinitis	1	0.0555556	109.967	0.00905472	1	0.027
Indications (Drug categories with the same indications)	Rhinitis perennial	1	0.0434783	86.0609	0.0115553	1	0.0302
Indications (Drug categories with the same indications)	Rhinitis seasonal	1	0.0322581	63.8516	0.0155432	1	0.0346
Indications (Drug categories with the same indications)	Seasonal allergy	1	0.0322581	63.8516	0.0155432	1	0.0346
Indications (Drug categories with the same indications)	Sickness	1	0.0769231	152.262	0.00654778	1	0.0231
Indications (Drug categories with the same indications)	Vasomotor rhinitis	1	0.166667	329.9	0.0030274	1	0.0174
Indications (Drug categories with the same indications)	Vertigo	1	0.2	395.88	0.00252347	1	0.0164
Indications (Drug categories with the same indications)	Vomiting	1	0.0185185	36.6556	0.0269189	1	0.0461
Pathway (Drug categories with the same pathways)	Diflunisal Action Pathway	1	0.166667	329.9	0.0030274	1	0.0174
Side effect (Drug categories with the similar side effect)	Abdominal discomfort	1	0.00355872	7.04413	0.132377	1	0.14
Side effect (Drug categories with the similar side effect)	Abdominal distension	1	0.00357143	7.06929	0.131939	1	0.1397
Side effect (Drug categories with the similar side effect)	Abdominal pain	3	0.00383142	7.58391	0.00766602	1	0.0255
Side effect (Drug categories with the similar side effect)	Abdominal pain upper	2	0.00754717	14.9389	0.00817504	1	0.0264
Side effect (Drug categories with the similar side effect)	Abnormal vision	2	0.0116959	23.1509	0.00350519	1	0.0184
Side effect (Drug categories with the similar side effect)	Abscess	1	0.00970874	19.2175	0.0507178	1	0.069
Side effect (Drug categories with the similar side effect)	Accommodation disorder	1	0.0144928	28.687	0.034267	1	0.0537
Side effect (Drug categories with the similar side effect)	Ache	1	0.0178571	35.3464	0.0279019	1	0.0474
Side effect (Drug categories with the similar side effect)	Acne	1	0.00806452	15.9629	0.0607382	1	0.0784
Side effect (Drug categories with the similar side effect)	Acute anaphylaxis	1	0.5	989.7	0.00101015	0.8738	0.0149
Side effect (Drug categories with the similar side effect)	Acute coronary syndrome	2	0.00628931	12.4491	0.0115736	1	0.0302
Side effect (Drug categories with the similar side effect)	Acute respiratory distress syndrome	1	0.0285714	56.5543	0.0175311	1	0.0365
Side effect (Drug categories with the similar side effect)	Adenitis	1	0.111111	219.933	0.00453765	1	0.0207
Side effect (Drug categories with the similar side effect)	Adrenal insufficiency	1	0.0454546	89.9727	0.0110557	1	0.0295
Side effect (Drug categories with the similar side effect)	Affect lability	2	0.00909091	17.9945	0.00571509	1	0.0223
Side effect (Drug categories with the similar side effect)	Agitation	4	0.0087146	17.2497	9.883e-05	0.0855	0.00629
Side effect (Drug categories with the similar side effect)	Agranulocytosis	3	0.00917431	18.1596	0.00065883	0.5699	0.0136
Side effect (Drug categories with the similar side effect)	Airway obstruction NOS	1	0.0555556	109.967	0.00905472	1	0.027
Side effect (Drug categories with the similar side effect)	Allergic cutaneous angiitis	1	0.03125	61.8563	0.0160406	1	0.0349
Side effect (Drug categories with the similar side effect)	Allergic granulomatous angiitis	1	0.25	494.85	0.00201928	1	0.0164
Side effect (Drug categories with the similar side effect)	Alopecia	2	0.00470588	9.31482	0.0199677	1	0.0386
Side effect (Drug categories with the similar side effect)	Altered state of consciousness	1	0.0172414	34.1276	0.0288839	1	0.0485
Side effect (Drug categories with the similar side effect)	Amnesia	2	0.00990099	19.598	0.00484523	1	0.021
Side effect (Drug categories with the similar side effect)	Anaemia	1	0.00198807	3.93519	0.224449	1	0.2252
Side effect (Drug categories with the similar side effect)	Anaphylactic shock	4	0.00677966	13.4197	0.00025646	0.2218	0.00792
Side effect (Drug categories with the similar side effect)	Anaphylactoid reaction	1	0.00423729	8.38729	0.112421	1	0.1213
Side effect (Drug categories with the similar side effect)	Angina pectoris	1	0.00350877	6.94526	0.134129	1	0.1415
Side effect (Drug categories with the similar side effect)	Angioedema	4	0.00803213	15.8988	0.00013492	0.1167	0.00648
Side effect (Drug categories with the similar side effect)	Angiopathy	2	0.0044843	8.87623	0.0218399	1	0.0409
Side effect (Drug categories with the similar side effect)	Ankle edema	1	0.1	197.94	0.00504057	1	0.021
Side effect (Drug categories with the similar side effect)	Anorectal discomfort	1	0.0135135	26.7486	0.036704	1	0.0562
Side effect (Drug categories with the similar side effect)	Anorectal disorder	1	0.0163934	32.4492	0.0303549	1	0.0494
Side effect (Drug categories with the similar side effect)	Anorexia	3	0.00516351	10.2207	0.00337301	1	0.0184
Side effect (Drug categories with the similar side effect)	Anosmia	1	0.0476191	94.2571	0.0105559	1	0.0289
Side effect (Drug categories with the similar side effect)	Anus disorder	1	0.5	989.7	0.00101015	0.8738	0.0149
Side effect (Drug categories with the similar side effect)	Anxiety	2	0.00382409	7.56941	0.0292883	1	0.049
Side effect (Drug categories with the similar side effect)	Aphasia	1	0.0116279	23.0163	0.0425277	1	0.0615
Side effect (Drug categories with the similar side effect)	Apnoea	2	0.017094	33.8359	0.00166634	1	0.0162
Side effect (Drug categories with the similar side effect)	Appetite absent	1	0.016129	31.9258	0.0308448	1	0.05
Side effect (Drug categories with the similar side effect)	Appetite exaggerated	1	0.333333	659.8	0.00151485	1	0.0159
Side effect (Drug categories with the similar side effect)	Arrhythmia	1	0.00252525	4.99848	0.18136	1	0.185
Side effect (Drug categories with the similar side effect)	Arrhythmia supraventricular	1	0.0204082	40.3959	0.0244572	1	0.0439
Side effect (Drug categories with the similar side effect)	Arthralgia	2	0.0035461	7.01915	0.0336084	1	0.053
Side effect (Drug categories with the similar side effect)	Arthritis	1	0.00454545	8.99727	0.105216	1	0.1149
Side effect (Drug categories with the similar side effect)	Arthritis aggravated	1	0.0833333	164.95	0.00604563	1	0.0223
Side effect (Drug categories with the similar side effect)	Arthropathy	1	0.00769231	15.2262	0.0635818	1	0.0809
Side effect (Drug categories with the similar side effect)	Asthenia	5	0.00574053	11.3628	8.774e-05	0.0759	0.00629
Side effect (Drug categories with the similar side effect)	Asthma	1	0.00384615	7.61308	0.123121	1	0.1315
Side effect (Drug categories with the similar side effect)	Ataxia	1	0.00425532	8.42298	0.111973	1	0.1209
Side effect (Drug categories with the similar side effect)	Atrial arrhythmia	1	0.0333333	65.98	0.0150456	1	0.0346
Side effect (Drug categories with the similar side effect)	Atrial fibrillation	2	0.00970874	19.2175	0.00503278	1	0.021
Side effect (Drug categories with the similar side effect)	Atrioventricular block	2	0.0149254	29.5433	0.00217571	1	0.0164
Side effect (Drug categories with the similar side effect)	Auditory and visual hallucinations	1	0.111111	219.933	0.00453765	1	0.0207
Side effect (Drug categories with the similar side effect)	Auditory disorder NOS	1	0.0769231	152.262	0.00654778	1	0.0231
Side effect (Drug categories with the similar side effect)	Autonomic nervous system imbalance	1	0.05	98.97	0.0100557	1	0.0285
Side effect (Drug categories with the similar side effect)	Back pain	2	0.004158	8.23035	0.0251144	1	0.0446
Side effect (Drug categories with the similar side effect)	Bad taste	1	0.0344828	68.2552	0.0145477	1	0.0341
Side effect (Drug categories with the similar side effect)	Benign intracranial hypertension	1	0.030303	59.9818	0.0165377	1	0.0352
Side effect (Drug categories with the similar side effect)	Black hairy tongue	1	0.0588235	116.435	0.00855384	1	0.0264
Side effect (Drug categories with the similar side effect)	Blindness cortical	1	0.0909091	179.945	0.00554322	1	0.0219
Side effect (Drug categories with the similar side effect)	Blister	1	0.0104167	20.6187	0.0473539	1	0.0659
Side effect (Drug categories with the similar side effect)	Block heart	1	0.0142857	28.2771	0.0347549	1	0.0541
Side effect (Drug categories with the similar side effect)	Blood alkaline phosphatase increased	1	0.00534759	10.585	0.0901695	1	0.1026
Side effect (Drug categories with the similar side effect)	Blood and lymphatic system disorders	3	0.00627615	12.423	0.00195006	1	0.0164
Side effect (Drug categories with the similar side effect)	Blood cortisol decreased	1	0.2	395.88	0.00252347	1	0.0164
Side effect (Drug categories with the similar side effect)	Blood lactate dehydrogenase increased	1	0.0120482	23.8482	0.0410751	1	0.0605
Side effect (Drug categories with the similar side effect)	Blood urea increased	1	0.00621118	12.2944	0.0781367	1	0.0939
Side effect (Drug categories with the similar side effect)	Body temperature increased	4	0.00540541	10.6995	0.00059799	0.5173	0.0134
Side effect (Drug categories with the similar side effect)	Bone disorder	2	0.016	31.6704	0.00189796	1	0.0164
Side effect (Drug categories with the similar side effect)	Bradycardia	1	0.00283286	5.60737	0.163377	1	0.1672
Side effect (Drug categories with the similar side effect)	Brain oedema	1	0.03125	61.8563	0.0160406	1	0.0349
Side effect (Drug categories with the similar side effect)	Breast disorder	1	0.004	7.9176	0.118679	1	0.1274
Side effect (Drug categories with the similar side effect)	Breast enlargement	1	0.0114942	22.7517	0.0430114	1	0.062
Side effect (Drug categories with the similar side effect)	Bronchitis	1	0.00347222	6.87292	0.135441	1	0.1425
Side effect (Drug categories with the similar side effect)	Bronchoconstriction	1	0.0476191	94.2571	0.0105559	1	0.0289
Side effect (Drug categories with the similar side effect)	Bronchospasm	4	0.0144404	28.5834	1.4e-05	0.0121	0.00321
Side effect (Drug categories with the similar side effect)	Bronchospasm paradoxical	1	0.0769231	152.262	0.00654778	1	0.0231
Side effect (Drug categories with the similar side effect)	Buffalo hump	1	0.05	98.97	0.0100557	1	0.0285
Side effect (Drug categories with the similar side effect)	Bundle branch block	1	0.0153846	30.4523	0.0323129	1	0.0514
Side effect (Drug categories with the similar side effect)	Burning in throat	1	0.2	395.88	0.00252347	1	0.0164
Side effect (Drug categories with the similar side effect)	C-reactive protein increased	1	0.142857	282.771	0.00353107	1	0.0184
Side effect (Drug categories with the similar side effect)	Candida albicans infection	1	0.125	247.425	0.00403449	1	0.0196
Side effect (Drug categories with the similar side effect)	Candida infection	1	0.00617284	12.2185	0.0786024	1	0.0942
Side effect (Drug categories with the similar side effect)	Cardiac arrest	1	0.00438596	8.68158	0.108826	1	0.1181
Side effect (Drug categories with the similar side effect)	Cardiac disorder	2	0.00486618	9.63212	0.018759	1	0.038
Side effect (Drug categories with the similar side effect)	Cardiac failure	1	0.0046729	9.24953	0.102499	1	0.1128
Side effect (Drug categories with the similar side effect)	Cardiac failure congestive	1	0.00510204	10.099	0.094298	1	0.1057
Side effect (Drug categories with the similar side effect)	Cataract	1	0.00729927	14.4482	0.0668883	1	0.0832
Side effect (Drug categories with the similar side effect)	Cellulitis gangrenous	1	0.2	395.88	0.00252347	1	0.0164
Side effect (Drug categories with the similar side effect)	Cerebral infarction	1	0.025641	50.7538	0.019515	1	0.0386
Side effect (Drug categories with the similar side effect)	Cerebral ischaemia	1	0.0166667	32.99	0.0298648	1	0.0491
Side effect (Drug categories with the similar side effect)	Cerebration impaired	1	0.012987	25.7065	0.0381632	1	0.0575
Side effect (Drug categories with the similar side effect)	Cerebrovascular accident	2	0.00921659	18.2433	0.00556551	1	0.0219
Side effect (Drug categories with the similar side effect)	Chest discomfort	1	0.0075188	14.8827	0.0650003	1	0.0817
Side effect (Drug categories with the similar side effect)	Chest pain	3	0.00566038	11.2042	0.00260853	1	0.0168
Side effect (Drug categories with the similar side effect)	Chills	2	0.00461894	9.14273	0.0206726	1	0.0396
Side effect (Drug categories with the similar side effect)	Cholestasis	1	0.00980392	19.4059	0.0502379	1	0.0685
Side effect (Drug categories with the similar side effect)	Chorea	1	0.0454546	89.9727	0.0110557	1	0.0295
Side effect (Drug categories with the similar side effect)	Clotting	1	0.0294118	58.2176	0.0170345	1	0.036
Side effect (Drug categories with the similar side effect)	Coagulopathy	1	0.00961538	19.0327	0.0511973	1	0.0693
Side effect (Drug categories with the similar side effect)	Coma	1	0.00598802	11.8527	0.0809276	1	0.0954
Side effect (Drug categories with the similar side effect)	Compartment syndrome	1	0.125	247.425	0.00403449	1	0.0196
Side effect (Drug categories with the similar side effect)	Confusional state	4	0.00756144	14.9671	0.00016974	0.1468	0.00667
Side effect (Drug categories with the similar side effect)	Congenital eye disorder	1	0.0454546	89.9727	0.0110557	1	0.0295
Side effect (Drug categories with the similar side effect)	Conjunctivitis	2	0.00626959	12.41	0.0116427	1	0.0303
Side effect (Drug categories with the similar side effect)	Connective tissue disorder	3	0.00757576	14.9955	0.00114196	0.9878	0.0159
Side effect (Drug categories with the similar side effect)	Constipation	5	0.00736377	14.5758	2.774e-05	0.024	0.00343
Side effect (Drug categories with the similar side effect)	Contusion	1	0.00746269	14.7716	0.0654726	1	0.0818
Side effect (Drug categories with the similar side effect)	Convulsion	3	0.00603622	11.9481	0.00217693	1	0.0164
Side effect (Drug categories with the similar side effect)	Coordination abnormal	2	0.0142857	28.2771	0.00237091	1	0.0164
Side effect (Drug categories with the similar side effect)	Coronary artery thrombosis	1	0.0833333	164.95	0.00604563	1	0.0223
Side effect (Drug categories with the similar side effect)	Cough	2	0.00365631	7.23729	0.0317885	1	0.0512
Side effect (Drug categories with the similar side effect)	Cough increased	2	0.0138889	27.4917	0.00250547	1	0.0164
Side effect (Drug categories with the similar side effect)	Cramp muscle	3	0.011236	22.2404	0.00036608	0.3167	0.0106
Side effect (Drug categories with the similar side effect)	Crohn's disease	1	0.0769231	152.262	0.00654778	1	0.0231
Side effect (Drug categories with the similar side effect)	Crohns disease aggravated	1	0.333333	659.8	0.00151485	1	0.0159
Side effect (Drug categories with the similar side effect)	Cushing's syndrome	1	0.04	79.176	0.0125538	1	0.0316
Side effect (Drug categories with the similar side effect)	Cushingoid	1	0.0833333	164.95	0.00604563	1	0.0223
Side effect (Drug categories with the similar side effect)	Cyanosis	1	0.0104167	20.6187	0.0473539	1	0.0659
Side effect (Drug categories with the similar side effect)	Deafness	1	0.0052356	10.3634	0.0920067	1	0.1043
Side effect (Drug categories with the similar side effect)	Decreased appetite	3	0.00449775	8.90285	0.00494522	1	0.021
Side effect (Drug categories with the similar side effect)	Delusion	1	0.0105263	20.8358	0.0468724	1	0.0656
Side effect (Drug categories with the similar side effect)	Depressed level of consciousness	1	0.00704225	13.9394	0.069243	1	0.0853
Side effect (Drug categories with the similar side effect)	Dermatitis	4	0.003861	7.64247	0.00203792	1	0.0164
Side effect (Drug categories with the similar side effect)	Dermatitis bullous	1	0.0049505	9.79901	0.0970399	1	0.108
Side effect (Drug categories with the similar side effect)	Dermatitis contact	1	0.00666667	13.196	0.0729981	1	0.0888
Side effect (Drug categories with the similar side effect)	Dermatitis exfoliative	1	0.00492611	9.75074	0.0974961	1	0.1084
Side effect (Drug categories with the similar side effect)	Diabetes insipidus	1	0.125	247.425	0.00403449	1	0.0196
Side effect (Drug categories with the similar side effect)	Diarrhoea	4	0.00428725	8.48617	0.00139794	1	0.0159
Side effect (Drug categories with the similar side effect)	Discomfort	2	0.00369686	7.31756	0.0311557	1	0.0504
Side effect (Drug categories with the similar side effect)	Disorder sight	1	0.0175439	34.7263	0.028393	1	0.0479
Side effect (Drug categories with the similar side effect)	Disorientation	3	0.0172414	34.1276	0.0001043	0.0902	0.00629
Side effect (Drug categories with the similar side effect)	Disturbance in attention	1	0.00787402	15.5858	0.0621611	1	0.0797
Side effect (Drug categories with the similar side effect)	Disturbance in sexual arousal	1	0.0044843	8.87623	0.106571	1	0.116
Side effect (Drug categories with the similar side effect)	Dizziness	5	0.00507099	10.0375	0.00015411	0.1333	0.00667
Side effect (Drug categories with the similar side effect)	Drowsiness	2	0.00680272	13.4653	0.00996925	1	0.0285
Side effect (Drug categories with the similar side effect)	Drug eruption	1	0.0126582	25.0557	0.0391348	1	0.0586
Side effect (Drug categories with the similar side effect)	Drug fever	1	0.025641	50.7538	0.019515	1	0.0386
Side effect (Drug categories with the similar side effect)	Drug reaction with eosinophilia and systemic symptoms	1	0.0625	123.713	0.0080527	1	0.0263
Side effect (Drug categories with the similar side effect)	Drug withdrawal syndrome	1	0.0175439	34.7263	0.028393	1	0.0479
Side effect (Drug categories with the similar side effect)	Dry mouth	3	0.00554529	10.9763	0.00276325	1	0.017
Side effect (Drug categories with the similar side effect)	Dysgeusia	3	0.00668151	13.2254	0.00163325	1	0.0162
Side effect (Drug categories with the similar side effect)	Dyskinesia	1	0.0078125	15.4641	0.0626349	1	0.0801
Side effect (Drug categories with the similar side effect)	Dysmenorrhoea	1	0.00757576	14.9955	0.0645277	1	0.0815
Side effect (Drug categories with the similar side effect)	Dyspepsia	4	0.00596125	11.7997	0.00041554	0.3594	0.0112
Side effect (Drug categories with the similar side effect)	Dysphagia	1	0.00383142	7.58391	0.123564	1	0.1318
Side effect (Drug categories with the similar side effect)	Dysphonia	2	0.0178571	35.3464	0.00152893	1	0.0159
Side effect (Drug categories with the similar side effect)	Dyspnoea	3	0.00445104	8.81039	0.00508946	1	0.0211
Side effect (Drug categories with the similar side effect)	Dysuria	3	0.010453	20.6906	0.0004516	0.3906	0.0118
Side effect (Drug categories with the similar side effect)	Ear infection	1	0.0196078	38.8118	0.0254426	1	0.0448
Side effect (Drug categories with the similar side effect)	Ear pain	1	0.00568182	11.2466	0.085098	1	0.0992
Side effect (Drug categories with the similar side effect)	Ear pruritus	1	0.5	989.7	0.00101015	0.8738	0.0149
Side effect (Drug categories with the similar side effect)	Ecchymosis	1	0.00578035	11.4416	0.0837099	1	0.0979
Side effect (Drug categories with the similar side effect)	Eczema	1	0.00512821	10.1508	0.0938402	1	0.1054
Side effect (Drug categories with the similar side effect)	Effusion	1	0.0909091	179.945	0.00554322	1	0.0219
Side effect (Drug categories with the similar side effect)	Endocrine disorder	2	0.016	31.6704	0.00189796	1	0.0164
Side effect (Drug categories with the similar side effect)	Enteritis	1	0.027027	53.4973	0.0185235	1	0.0377
Side effect (Drug categories with the similar side effect)	Eosinophilia	1	0.0035461	7.01915	0.132815	1	0.1403
Side effect (Drug categories with the similar side effect)	Epigastric distress	1	0.0227273	44.9864	0.0219892	1	0.0409
Side effect (Drug categories with the similar side effect)	Epigastric pain	1	0.0185185	36.6556	0.0269189	1	0.0461
Side effect (Drug categories with the similar side effect)	Epistaxis	2	0.00593472	11.7472	0.0129184	1	0.0319
Side effect (Drug categories with the similar side effect)	Erectile dysfunction	1	0.00346021	6.84913	0.135877	1	0.1428
Side effect (Drug categories with the similar side effect)	Eructation	1	0.00657895	13.0224	0.0739345	1	0.0898
Side effect (Drug categories with the similar side effect)	Eruption	1	0.0123457	24.437	0.0401054	1	0.0596
Side effect (Drug categories with the similar side effect)	Erythema	2	0.004329	8.56883	0.0233133	1	0.0427
Side effect (Drug categories with the similar side effect)	Erythema multiforme	2	0.00529101	10.473	0.0160386	1	0.0349
Side effect (Drug categories with the similar side effect)	Excessive thirst	1	0.125	247.425	0.00403449	1	0.0196
Side effect (Drug categories with the similar side effect)	Excitement	1	0.0185185	36.6556	0.0269189	1	0.0461
Side effect (Drug categories with the similar side effect)	Extrapyramidal disorder	1	0.0102041	20.198	0.0483162	1	0.067
Side effect (Drug categories with the similar side effect)	Extrapyramidal symptoms	1	0.0153846	30.4523	0.0323129	1	0.0514
Side effect (Drug categories with the similar side effect)	Extrasystoles	1	0.00917431	18.1596	0.0535916	1	0.0716
Side effect (Drug categories with the similar side effect)	Extravasation	1	0.01	19.794	0.0492776	1	0.0678
Side effect (Drug categories with the similar side effect)	Eye disorder	3	0.00746269	14.7716	0.0011921	1	0.0159
Side effect (Drug categories with the similar side effect)	Eye infection	1	0.0344828	68.2552	0.0145477	1	0.0341
Side effect (Drug categories with the similar side effect)	Face oedema	2	0.0083682	16.564	0.00670469	1	0.0236
Side effect (Drug categories with the similar side effect)	Fatigue	3	0.00429185	8.49528	0.00562518	1	0.022
Side effect (Drug categories with the similar side effect)	Feeling abnormal	4	0.00568182	11.2466	0.00049694	0.4299	0.0121
Side effect (Drug categories with the similar side effect)	Feeling hot	1	0.00892857	17.6732	0.0550253	1	0.073
Side effect (Drug categories with the similar side effect)	Fixed drug eruption	1	0.0526316	104.179	0.00955535	1	0.0279
Side effect (Drug categories with the similar side effect)	Flatulence	3	0.00704225	13.9394	0.00140648	1	0.0159
Side effect (Drug categories with the similar side effect)	Fluid retention	1	0.00645161	12.7703	0.0753374	1	0.0913
Side effect (Drug categories with the similar side effect)	Flushing	3	0.0071599	14.1723	0.00134164	1	0.0159
Side effect (Drug categories with the similar side effect)	Fracture	1	0.0133333	26.392	0.0371906	1	0.0565
Side effect (Drug categories with the similar side effect)	Galactorrhoea	1	0.0125	24.7425	0.0396203	1	0.0591
Side effect (Drug categories with the similar side effect)	Gastric disorder	1	0.111111	219.933	0.00453765	1	0.0207
Side effect (Drug categories with the similar side effect)	Gastritis	1	0.00387597	7.67209	0.122234	1	0.1307
Side effect (Drug categories with the similar side effect)	Gastroenteritis	1	0.00520833	10.3094	0.0924654	1	0.1046
Side effect (Drug categories with the similar side effect)	Gastrointestinal disorder	2	0.00276625	5.47552	0.052445	1	0.0708
Side effect (Drug categories with the similar side effect)	Gastrointestinal fistula	1	0.2	395.88	0.00252347	1	0.0164
Side effect (Drug categories with the similar side effect)	Gastrointestinal haemorrhage	1	0.00473934	9.38104	0.101137	1	0.1116
Side effect (Drug categories with the similar side effect)	Gastrointestinal pain	4	0.00539084	10.6706	0.000604	0.5225	0.0134
Side effect (Drug categories with the similar side effect)	Gastrointestinal perforation	1	0.037037	73.3111	0.0135513	1	0.0327
Side effect (Drug categories with the similar side effect)	Glaucoma	1	0.00990099	19.598	0.0497579	1	0.0681
Side effect (Drug categories with the similar side effect)	Glossitis	1	0.00735294	14.5544	0.0664167	1	0.0828
Side effect (Drug categories with the similar side effect)	Gravitational oedema	1	0.04	79.176	0.0125538	1	0.0316
Side effect (Drug categories with the similar side effect)	Growth retardation	1	0.0384615	76.1308	0.0130527	1	0.0319
Side effect (Drug categories with the similar side effect)	Gynaecomastia	1	0.0060241	11.9241	0.080463	1	0.095
Side effect (Drug categories with the similar side effect)	Haematoma	1	0.010101	19.9939	0.048797	1	0.0673
Side effect (Drug categories with the similar side effect)	Haematuria	3	0.00914634	18.1043	0.00066466	0.5749	0.0136
Side effect (Drug categories with the similar side effect)	Haemoglobin	2	0.00549451	10.8758	0.0149402	1	0.0346
Side effect (Drug categories with the similar side effect)	Haemoglobin increased	1	0.0833333	164.95	0.00604563	1	0.0223
Side effect (Drug categories with the similar side effect)	Haemolytic anaemia	1	0.00510204	10.099	0.094298	1	0.1057
Side effect (Drug categories with the similar side effect)	Haemorrhage	2	0.00546448	10.8164	0.015095	1	0.0346
Side effect (Drug categories with the similar side effect)	Haemorrhoids	1	0.0119048	23.5643	0.0415595	1	0.0608
Side effect (Drug categories with the similar side effect)	Hair growth abnormal	1	0.0714286	141.386	0.00704967	1	0.0241
Side effect (Drug categories with the similar side effect)	Hallucination	2	0.00591716	11.7124	0.012991	1	0.0319
Side effect (Drug categories with the similar side effect)	Hallucinations, mixed	1	0.111111	219.933	0.00453765	1	0.0207
Side effect (Drug categories with the similar side effect)	Headache	5	0.00471254	9.32799	0.00021423	0.1853	0.00772
Side effect (Drug categories with the similar side effect)	Hearing impaired	2	0.0143885	28.4806	0.00233782	1	0.0164
Side effect (Drug categories with the similar side effect)	Hepatic function abnormal	1	0.00546448	10.8164	0.0883286	1	0.1015
Side effect (Drug categories with the similar side effect)	Hepatitis	3	0.00840336	16.6336	0.00084835	0.7338	0.0149
Side effect (Drug categories with the similar side effect)	Hepatitis cholestatic	1	0.0212766	42.1149	0.0234707	1	0.0427
Side effect (Drug categories with the similar side effect)	Hepatobiliary disease	1	0.00294118	5.82176	0.157863	1	0.1628
Side effect (Drug categories with the similar side effect)	Herpes simplex	1	0.00775194	15.3442	0.0631084	1	0.0806
Side effect (Drug categories with the similar side effect)	Hirsutism	1	0.0136986	27.1151	0.0362171	1	0.0555
Side effect (Drug categories with the similar side effect)	Hoarseness	2	0.0384615	76.1308	0.00033279	0.2879	0.00993
Side effect (Drug categories with the similar side effect)	Hyperadrenocorticism	1	0.0769231	152.262	0.00654778	1	0.0231
Side effect (Drug categories with the similar side effect)	Hyperhidrosis	3	0.00520833	10.3094	0.00329268	1	0.0184
Side effect (Drug categories with the similar side effect)	Hyperkinesia	1	0.00606061	11.9964	0.0799982	1	0.0947
Side effect (Drug categories with the similar side effect)	Hypersensitive syndrome	1	0.0714286	141.386	0.00704967	1	0.0241
Side effect (Drug categories with the similar side effect)	Hypersensitivity	4	0.00461361	9.13218	0.00107066	0.9261	0.0152
Side effect (Drug categories with the similar side effect)	Hypertension	4	0.00740741	14.6622	0.00018352	0.1587	0.0069
Side effect (Drug categories with the similar side effect)	Hyperthyroidism	1	0.0204082	40.3959	0.0244572	1	0.0439
Side effect (Drug categories with the similar side effect)	Hypertonia	2	0.0116279	23.0163	0.00354524	1	0.0184
Side effect (Drug categories with the similar side effect)	Hypoaesthesia	2	0.00560224	11.0891	0.0144037	1	0.0341
Side effect (Drug categories with the similar side effect)	Hypokalaemia	1	0.00398406	7.88606	0.119124	1	0.1277
Side effect (Drug categories with the similar side effect)	Hypomania	1	0.030303	59.9818	0.0165377	1	0.0352
Side effect (Drug categories with the similar side effect)	Hypotension	3	0.00469484	9.29296	0.0043931	1	0.0207
Side effect (Drug categories with the similar side effect)	Hypothyroidism	1	0.011236	22.2404	0.0439781	1	0.0627
Side effect (Drug categories with the similar side effect)	Hypotonia	1	0.0153846	30.4523	0.0323129	1	0.0514
Side effect (Drug categories with the similar side effect)	Ileus paralytic	1	0.0204082	40.3959	0.0244572	1	0.0439
Side effect (Drug categories with the similar side effect)	Ill-defined disorder	2	0.00421941	8.3519	0.0244444	1	0.0439
Side effect (Drug categories with the similar side effect)	Immune system disorder	2	0.00455581	9.01777	0.021208	1	0.0403
Side effect (Drug categories with the similar side effect)	Impaired healing	1	0.0178571	35.3464	0.0279019	1	0.0474
Side effect (Drug categories with the similar side effect)	Inappropriate antidiuretic hormone secretion	1	0.0142857	28.2771	0.0347549	1	0.0541
Side effect (Drug categories with the similar side effect)	Increased appetite	2	0.00956938	18.9416	0.0051756	1	0.0212
Side effect (Drug categories with the similar side effect)	Infarction	1	0.0294118	58.2176	0.0170345	1	0.036
Side effect (Drug categories with the similar side effect)	Infection	1	0.0017301	3.42457	0.253292	1	0.2533
Side effect (Drug categories with the similar side effect)	Infestation	1	0.00287356	5.68793	0.161261	1	0.1653
Side effect (Drug categories with the similar side effect)	Infestation NOS	1	0.00287356	5.68793	0.161261	1	0.1653
Side effect (Drug categories with the similar side effect)	Inflammation	1	0.00671141	13.2846	0.0725296	1	0.0884
Side effect (Drug categories with the similar side effect)	Influenza	1	0.00359712	7.12014	0.131061	1	0.1389
Side effect (Drug categories with the similar side effect)	Injection site haemorrhage	1	0.025	49.485	0.0200103	1	0.0386
Side effect (Drug categories with the similar side effect)	Injection site pain	1	0.00719424	14.2403	0.0678309	1	0.0841
Side effect (Drug categories with the similar side effect)	Injection site reaction	2	0.0105263	20.8358	0.00430252	1	0.0206
Side effect (Drug categories with the similar side effect)	Insomnia	5	0.00771605	15.2731	2.229e-05	0.0193	0.00321
Side effect (Drug categories with the similar side effect)	Intestinal obstruction	1	0.011236	22.2404	0.0439781	1	0.0627
Side effect (Drug categories with the similar side effect)	Intraocular pressure increased	1	0.0192308	38.0654	0.025935	1	0.0452
Side effect (Drug categories with the similar side effect)	Irritability	1	0.00460829	9.12166	0.103858	1	0.1139
Side effect (Drug categories with the similar side effect)	Jaundice	2	0.00619195	12.2563	0.0119212	1	0.0306
Side effect (Drug categories with the similar side effect)	Jaundice cholestatic	1	0.00806452	15.9629	0.0607382	1	0.0784
Side effect (Drug categories with the similar side effect)	Joint swelling	2	0.03125	61.8563	0.00050392	0.4359	0.0121
Side effect (Drug categories with the similar side effect)	Lacrimal disorder	1	0.0185185	36.6556	0.0269189	1	0.0461
Side effect (Drug categories with the similar side effect)	Lacrimal structural disorder	1	0.03125	61.8563	0.0160406	1	0.0349
Side effect (Drug categories with the similar side effect)	Lacrimation	2	0.025	49.485	0.00078565	0.6796	0.0149
Side effect (Drug categories with the similar side effect)	Lacrimation increased	2	0.0141844	28.0766	0.00240422	1	0.0164
Side effect (Drug categories with the similar side effect)	Laryngeal oedema	1	0.0117647	23.2871	0.0420437	1	0.0612
Side effect (Drug categories with the similar side effect)	Laryngospasm	1	0.00980392	19.4059	0.0502379	1	0.0685
Side effect (Drug categories with the similar side effect)	Leukocytoclastic vasculitis	2	0.0357143	70.6929	0.00038598	0.3339	0.0108
Side effect (Drug categories with the similar side effect)	Leukocytosis	1	0.00699301	13.842	0.0697132	1	0.0857
Side effect (Drug categories with the similar side effect)	Leukopenia	1	0.00200803	3.9747	0.222487	1	0.2238
Side effect (Drug categories with the similar side effect)	Libido decreased	1	0.005	9.897	0.0961268	1	0.1072
Side effect (Drug categories with the similar side effect)	Lightheadedness	2	0.0133333	26.392	0.00271391	1	0.0168
Side effect (Drug categories with the similar side effect)	Lip swelling	1	0.05	98.97	0.0100557	1	0.0285
Side effect (Drug categories with the similar side effect)	Lipohypertrophy	1	0.0384615	76.1308	0.0130527	1	0.0319
Side effect (Drug categories with the similar side effect)	Local reaction	1	0.0131579	26.0447	0.037677	1	0.057
Side effect (Drug categories with the similar side effect)	Loss of consciousness	4	0.00782779	15.4943	0.00014882	0.1287	0.00667
Side effect (Drug categories with the similar side effect)	Lymphadenitis	1	0.0714286	141.386	0.00704967	1	0.0241
Side effect (Drug categories with the similar side effect)	Lymphadenopathy	1	0.00534759	10.585	0.0901695	1	0.1026
Side effect (Drug categories with the similar side effect)	Lymphadenopathy cervical	1	0.142857	282.771	0.00353107	1	0.0184
Side effect (Drug categories with the similar side effect)	Malaise	2	0.00408998	8.09571	0.0258892	1	0.0452
Side effect (Drug categories with the similar side effect)	Malnutrition	1	0.00218341	4.32183	0.206611	1	0.2098
Side effect (Drug categories with the similar side effect)	Mediastinal disorder	2	0.0045045	8.91622	0.0216586	1	0.0409
Side effect (Drug categories with the similar side effect)	Meningism	1	0.0588235	116.435	0.00855384	1	0.0264
Side effect (Drug categories with the similar side effect)	Meningitis chemical	1	0.25	494.85	0.00201928	1	0.0164
Side effect (Drug categories with the similar side effect)	Menstrual disorder	1	0.0113636	22.4932	0.0434949	1	0.0623
Side effect (Drug categories with the similar side effect)	Menstruation irregular	1	0.0142857	28.2771	0.0347549	1	0.0541
Side effect (Drug categories with the similar side effect)	Mental disability	1	0.00578035	11.4416	0.0837099	1	0.0979
Side effect (Drug categories with the similar side effect)	Mental disorder	3	0.00672646	13.3143	0.00160246	1	0.0161
Side effect (Drug categories with the similar side effect)	Metrorrhagia	1	0.0104167	20.6187	0.0473539	1	0.0659
Side effect (Drug categories with the similar side effect)	Micturition urgency	1	0.0131579	26.0447	0.037677	1	0.057
Side effect (Drug categories with the similar side effect)	Migraine	2	0.00884956	17.5168	0.00601974	1	0.0223
Side effect (Drug categories with the similar side effect)	Mood swings	2	0.00869565	17.2122	0.00622688	1	0.0228
Side effect (Drug categories with the similar side effect)	Mucosal swelling	1	0.333333	659.8	0.00151485	1	0.0159
Side effect (Drug categories with the similar side effect)	Mucous membrane disorder	1	0.0526316	104.179	0.00955535	1	0.0279
Side effect (Drug categories with the similar side effect)	Multiple fractures	1	0.0133333	26.392	0.0371906	1	0.0565
Side effect (Drug categories with the similar side effect)	Muscle relaxant therapy	1	0.0163934	32.4492	0.0303549	1	0.0494
Side effect (Drug categories with the similar side effect)	Muscle spasms	4	0.00849257	16.8102	0.00010908	0.0944	0.00629
Side effect (Drug categories with the similar side effect)	Muscle twitching	1	0.00699301	13.842	0.0697132	1	0.0857
Side effect (Drug categories with the similar side effect)	Muscular weakness	1	0.0037037	7.33111	0.127541	1	0.1355
Side effect (Drug categories with the similar side effect)	Musculoskeletal discomfort	2	0.00300752	5.95308	0.0452123	1	0.0639
Side effect (Drug categories with the similar side effect)	Musculoskeletal pain	1	0.00606061	11.9964	0.0799982	1	0.0947
Side effect (Drug categories with the similar side effect)	Myalgia	1	0.00182149	3.60546	0.242269	1	0.2428
Side effect (Drug categories with the similar side effect)	Myasthenia	1	0.0121951	24.139	0.0405904	1	0.06
Side effect (Drug categories with the similar side effect)	Mydriasis	2	0.0186916	36.9981	0.00139722	1	0.0159
Side effect (Drug categories with the similar side effect)	Myocardial infarction	2	0.00630915	12.4883	0.0115046	1	0.0302
Side effect (Drug categories with the similar side effect)	Myocardial ischaemia	1	0.00854701	16.9179	0.0574099	1	0.0755
Side effect (Drug categories with the similar side effect)	Nasal congestion	3	0.0148515	29.397	0.00016186	0.14	0.00667
Side effect (Drug categories with the similar side effect)	Nasal discomfort	1	0.0322581	63.8516	0.0155432	1	0.0346
Side effect (Drug categories with the similar side effect)	Nasal irritation	1	0.0588235	116.435	0.00855384	1	0.0264
Side effect (Drug categories with the similar side effect)	Nasal septum perforation	1	0.111111	219.933	0.00453765	1	0.0207
Side effect (Drug categories with the similar side effect)	Nasopharyngitis	1	0.00362319	7.17174	0.130182	1	0.1382
Side effect (Drug categories with the similar side effect)	Nausea	4	0.00352734	6.98201	0.00281054	1	0.017
Side effect (Drug categories with the similar side effect)	Neck pain	2	0.0134228	26.5691	0.00267862	1	0.0168
Side effect (Drug categories with the similar side effect)	Necrosis	1	0.0106383	21.0574	0.0463906	1	0.065
Side effect (Drug categories with the similar side effect)	Necrosis ischaemic	1	0.2	395.88	0.00252347	1	0.0164
Side effect (Drug categories with the similar side effect)	Necrotising fasciitis	1	0.2	395.88	0.00252347	1	0.0164
Side effect (Drug categories with the similar side effect)	Nephritis interstitial	1	0.0104167	20.6187	0.0473539	1	0.0659
Side effect (Drug categories with the similar side effect)	Nephrotic syndrome	1	0.015873	31.419	0.0313344	1	0.0506
Side effect (Drug categories with the similar side effect)	Nervous system disorder	3	0.00488599	9.67134	0.00393325	1	0.0196
Side effect (Drug categories with the similar side effect)	Nervousness	4	0.00947867	18.7621	7.161e-05	0.0619	0.00629
Side effect (Drug categories with the similar side effect)	Neuroleptic malignant syndrome	1	0.0166667	32.99	0.0298648	1	0.0491
Side effect (Drug categories with the similar side effect)	Neuropathy	1	0.00613497	12.1436	0.0790679	1	0.0942
Side effect (Drug categories with the similar side effect)	Neuropathy peripheral	1	0.00303951	6.01641	0.153169	1	0.1585
Side effect (Drug categories with the similar side effect)	Nightmare	1	0.00675676	13.3743	0.0720608	1	0.088
Side effect (Drug categories with the similar side effect)	Nocturia	1	0.0075188	14.8827	0.0650003	1	0.0817
Side effect (Drug categories with the similar side effect)	Numbness	2	0.0175439	34.7263	0.00158321	1	0.0161
Side effect (Drug categories with the similar side effect)	Obstructive airways disorder	1	0.04	79.176	0.0125538	1	0.0316
Side effect (Drug categories with the similar side effect)	Oculogyric crisis	1	0.025641	50.7538	0.019515	1	0.0386
Side effect (Drug categories with the similar side effect)	Oedema	3	0.00551471	10.9158	0.0028064	1	0.017
Side effect (Drug categories with the similar side effect)	Oedema mucosal	1	0.25	494.85	0.00201928	1	0.0164
Side effect (Drug categories with the similar side effect)	Oedema peripheral	2	0.00502513	9.94673	0.0176656	1	0.0366
Side effect (Drug categories with the similar side effect)	Oral candidiasis	1	0.0108696	21.5152	0.0454263	1	0.064
Side effect (Drug categories with the similar side effect)	Oropharyngeal candidiasis	1	0.166667	329.9	0.0030274	1	0.0174
Side effect (Drug categories with the similar side effect)	Oropharyngeal discomfort	2	0.0196078	38.8118	0.00127123	1	0.0159
Side effect (Drug categories with the similar side effect)	Oropharyngeal pain	2	0.013986	27.6839	0.0024715	1	0.0164
Side effect (Drug categories with the similar side effect)	Osteoarthritis	1	0.0046729	9.24953	0.102499	1	0.1128
Side effect (Drug categories with the similar side effect)	Osteonecrosis	1	0.0227273	44.9864	0.0219892	1	0.0409
Side effect (Drug categories with the similar side effect)	Osteoporosis	1	0.0133333	26.392	0.0371906	1	0.0565
Side effect (Drug categories with the similar side effect)	Otitis media	1	0.00990099	19.598	0.0497579	1	0.0681
Side effect (Drug categories with the similar side effect)	Pain	3	0.00424929	8.41105	0.00578098	1	0.0223
Side effect (Drug categories with the similar side effect)	Pain in extremity	1	0.00401606	7.9494	0.118233	1	0.1272
Side effect (Drug categories with the similar side effect)	Painful ejaculation	1	0.333333	659.8	0.00151485	1	0.0159
Side effect (Drug categories with the similar side effect)	Pallor	1	0.00746269	14.7716	0.0654726	1	0.0818
Side effect (Drug categories with the similar side effect)	Palpitations	4	0.00814664	16.1255	0.00012784	0.1106	0.00648
Side effect (Drug categories with the similar side effect)	Pancreatitis	2	0.00655738	12.9797	0.0106913	1	0.0292
Side effect (Drug categories with the similar side effect)	Paraesthesia	5	0.00796178	15.7596	1.924e-05	0.0166	0.00321
Side effect (Drug categories with the similar side effect)	Paralysis	1	0.0106383	21.0574	0.0463906	1	0.065
Side effect (Drug categories with the similar side effect)	Paresis	1	0.0227273	44.9864	0.0219892	1	0.0409
Side effect (Drug categories with the similar side effect)	Paresthesia of limbs	1	0.0666667	131.96	0.00755131	1	0.0252
Side effect (Drug categories with the similar side effect)	Parotid gland enlargement	1	0.05	98.97	0.0100557	1	0.0285
Side effect (Drug categories with the similar side effect)	Parotid swelling	1	0.0833333	164.95	0.00604563	1	0.0223
Side effect (Drug categories with the similar side effect)	Peptic ulcer	1	0.0111111	21.9933	0.0444611	1	0.063
Side effect (Drug categories with the similar side effect)	Pericardial haemorrhage	1	0.125	247.425	0.00403449	1	0.0196
Side effect (Drug categories with the similar side effect)	Peripheral vascular disorder	1	0.0169491	33.5492	0.0293745	1	0.049
Side effect (Drug categories with the similar side effect)	Petechiae	1	0.00877193	17.3632	0.0559798	1	0.074
Side effect (Drug categories with the similar side effect)	Pharyngeal disorder	1	0.142857	282.771	0.00353107	1	0.0184
Side effect (Drug categories with the similar side effect)	Pharyngeal oedema	1	0.037037	73.3111	0.0135513	1	0.0327
Side effect (Drug categories with the similar side effect)	Pharyngitis	2	0.00543478	10.7576	0.0152506	1	0.0346
Side effect (Drug categories with the similar side effect)	Phosphatase alkaline increased	1	0.00680272	13.4653	0.0715917	1	0.0877
Side effect (Drug categories with the similar side effect)	Photophobia	1	0.00625	12.3712	0.0776707	1	0.0936
Side effect (Drug categories with the similar side effect)	Photosensitivity	1	0.00543478	10.7576	0.0887891	1	0.1016
Side effect (Drug categories with the similar side effect)	Photosensitivity reaction	1	0.0033557	6.64228	0.139799	1	0.1459
Side effect (Drug categories with the similar side effect)	Pleural effusion	1	0.00892857	17.6732	0.0550253	1	0.073
Side effect (Drug categories with the similar side effect)	Pollakiuria	3	0.0102389	20.2669	0.00047954	0.4148	0.0121
Side effect (Drug categories with the similar side effect)	Procedural complication	1	0.0909091	179.945	0.00554322	1	0.0219
Side effect (Drug categories with the similar side effect)	Proctalgia	1	0.016129	31.9258	0.0308448	1	0.05
Side effect (Drug categories with the similar side effect)	Protein urine present	1	0.0075188	14.8827	0.0650003	1	0.0817
Side effect (Drug categories with the similar side effect)	Proteinuria	1	0.00769231	15.2262	0.0635818	1	0.0809
Side effect (Drug categories with the similar side effect)	Pruritus	5	0.00556793	11.0212	0.00010086	0.0872	0.00629
Side effect (Drug categories with the similar side effect)	Psychiatric symptom	1	0.0909091	179.945	0.00554322	1	0.0219
Side effect (Drug categories with the similar side effect)	Psychotic disorder	1	0.00452489	8.95656	0.105668	1	0.1153
Side effect (Drug categories with the similar side effect)	Pulmonary hypertension	1	0.0243902	48.278	0.0205054	1	0.0394
Side effect (Drug categories with the similar side effect)	Pulmonary oedema	1	0.00578035	11.4416	0.0837099	1	0.0979
Side effect (Drug categories with the similar side effect)	Purpura	2	0.00956938	18.9416	0.0051756	1	0.0212
Side effect (Drug categories with the similar side effect)	Pyuria	1	0.025	49.485	0.0200103	1	0.0386
Side effect (Drug categories with the similar side effect)	Rash	4	0.00388727	7.69446	0.00198907	1	0.0164
Side effect (Drug categories with the similar side effect)	Rash pustular	1	0.00961538	19.0327	0.0511973	1	0.0693
Side effect (Drug categories with the similar side effect)	Rectal tenesmus	1	0.0212766	42.1149	0.0234707	1	0.0427
Side effect (Drug categories with the similar side effect)	Red blood cell sedimentation rate increased	1	0.0357143	70.6929	0.0140496	1	0.0336
Side effect (Drug categories with the similar side effect)	Renal failure	2	0.00619195	12.2563	0.0119212	1	0.0306
Side effect (Drug categories with the similar side effect)	Renal impairment	2	0.0097561	19.3112	0.00498558	1	0.021
Side effect (Drug categories with the similar side effect)	Renal pain	1	0.0151515	29.9909	0.0328018	1	0.0519
Side effect (Drug categories with the similar side effect)	Respiratory arrest	1	0.0196078	38.8118	0.0254426	1	0.0448
Side effect (Drug categories with the similar side effect)	Respiratory distress	1	0.011236	22.2404	0.0439781	1	0.0627
Side effect (Drug categories with the similar side effect)	Respiratory failure	1	0.0070922	14.0383	0.0687725	1	0.085
Side effect (Drug categories with the similar side effect)	Respiratory insufficiency	1	0.0322581	63.8516	0.0155432	1	0.0346
Side effect (Drug categories with the similar side effect)	Respiratory tract infection	1	0.0126582	25.0557	0.0391348	1	0.0586
Side effect (Drug categories with the similar side effect)	Rhinitis	2	0.00543478	10.7576	0.0152506	1	0.0346
Side effect (Drug categories with the similar side effect)	Rhinitis allergic	1	0.0384615	76.1308	0.0130527	1	0.0319
Side effect (Drug categories with the similar side effect)	Salivary gland enlargement	1	0.03125	61.8563	0.0160406	1	0.0349
Side effect (Drug categories with the similar side effect)	Salivary hypersecretion	1	0.00675676	13.3743	0.0720608	1	0.088
Side effect (Drug categories with the similar side effect)	Salivation	1	0.0232558	46.0326	0.0214949	1	0.0407
Side effect (Drug categories with the similar side effect)	Scab	1	0.0322581	63.8516	0.0155432	1	0.0346
Side effect (Drug categories with the similar side effect)	Scotoma	1	0.010101	19.9939	0.048797	1	0.0673
Side effect (Drug categories with the similar side effect)	Secondary adrenocortical insufficiency	1	0.0476191	94.2571	0.0105559	1	0.0289
Side effect (Drug categories with the similar side effect)	Sensation of heaviness	1	0.0714286	141.386	0.00704967	1	0.0241
Side effect (Drug categories with the similar side effect)	Sensation of warmth	1	0.0322581	63.8516	0.0155432	1	0.0346
Side effect (Drug categories with the similar side effect)	Sensory loss	2	0.0166667	32.99	0.0017515	1	0.0164
Side effect (Drug categories with the similar side effect)	Sepsis	1	0.00537634	10.6419	0.0897096	1	0.1024
Side effect (Drug categories with the similar side effect)	Septicemia	1	0.0476191	94.2571	0.0105559	1	0.0289
Side effect (Drug categories with the similar side effect)	Sexual dysfunction	1	0.0140845	27.8789	0.0352425	1	0.0545
Side effect (Drug categories with the similar side effect)	Shivering	1	0.025	49.485	0.0200103	1	0.0386
Side effect (Drug categories with the similar side effect)	Shock	4	0.00695652	13.7697	0.00023273	0.2013	0.00774
Side effect (Drug categories with the similar side effect)	Shoulder pain	1	0.0322581	63.8516	0.0155432	1	0.0346
Side effect (Drug categories with the similar side effect)	Sinusitis	1	0.00292398	5.78772	0.158714	1	0.1634
Side effect (Drug categories with the similar side effect)	Skin discolouration	1	0.00757576	14.9955	0.0645277	1	0.0815
Side effect (Drug categories with the similar side effect)	Skin disorder	3	0.00481541	9.53162	0.00409524	1	0.0198
Side effect (Drug categories with the similar side effect)	Skin irritation	1	0.0192308	38.0654	0.025935	1	0.0452
Side effect (Drug categories with the similar side effect)	Skin striae	1	0.025	49.485	0.0200103	1	0.0386
Side effect (Drug categories with the similar side effect)	Sleep disorder	1	0.00515464	10.2031	0.0933822	1	0.1053
Side effect (Drug categories with the similar side effect)	Sneezing	2	0.0240964	47.6964	0.00084521	0.7311	0.0149
Side effect (Drug categories with the similar side effect)	Soft tissue injury	1	0.166667	329.9	0.0030274	1	0.0174
Side effect (Drug categories with the similar side effect)	Somnolence	5	0.00775194	15.3442	2.181e-05	0.0189	0.00321
Side effect (Drug categories with the similar side effect)	Speech disorder	2	0.017094	33.8359	0.00166634	1	0.0162
Side effect (Drug categories with the similar side effect)	Speech impairment NOS	1	0.0476191	94.2571	0.0105559	1	0.0289
Side effect (Drug categories with the similar side effect)	Status asthmaticus	1	0.166667	329.9	0.0030274	1	0.0174
Side effect (Drug categories with the similar side effect)	Stevens-Johnson syndrome	2	0.00641026	12.6885	0.0111625	1	0.0296
Side effect (Drug categories with the similar side effect)	Stomatitis	2	0.00611621	12.1064	0.0122025	1	0.0311
Side effect (Drug categories with the similar side effect)	Stridor	1	0.025641	50.7538	0.019515	1	0.0386
Side effect (Drug categories with the similar side effect)	Subglottic edema	1	0.5	989.7	0.00101015	0.8738	0.0149
Side effect (Drug categories with the similar side effect)	Sweating	2	0.00625	12.3712	0.0117121	1	0.0304
Side effect (Drug categories with the similar side effect)	Sweating increased	2	0.00724638	14.3435	0.00883672	1	0.027
Side effect (Drug categories with the similar side effect)	Swelling	2	0.0100503	19.8935	0.00470674	1	0.021
Side effect (Drug categories with the similar side effect)	Swelling of knees	1	0.5	989.7	0.00101015	0.8738	0.0149
Side effect (Drug categories with the similar side effect)	Syncope	4	0.00817996	16.1914	0.00012586	0.1089	0.00648
Side effect (Drug categories with the similar side effect)	Tachycardia	4	0.00696864	13.7937	0.0002312	0.2	0.00774
Side effect (Drug categories with the similar side effect)	Tardive dyskinesia	1	0.025	49.485	0.0200103	1	0.0386
Side effect (Drug categories with the similar side effect)	Taste peculiar	1	0.1	197.94	0.00504057	1	0.021
Side effect (Drug categories with the similar side effect)	Tearing eyes	1	0.0588235	116.435	0.00855384	1	0.0264
Side effect (Drug categories with the similar side effect)	Tenderness	1	0.00869565	17.2122	0.0564568	1	0.0746
Side effect (Drug categories with the similar side effect)	Tension	5	0.0119904	23.7338	2.74e-06	0.00237	0.00167
Side effect (Drug categories with the similar side effect)	Testicular swelling	1	0.0625	123.713	0.0080527	1	0.0263
Side effect (Drug categories with the similar side effect)	Thirst	2	0.0097561	19.3112	0.00498558	1	0.021
Side effect (Drug categories with the similar side effect)	Throat irritation	2	0.030303	59.9818	0.00053581	0.4635	0.0125
Side effect (Drug categories with the similar side effect)	Throat sore	2	0.02	39.588	0.00122245	1	0.0159
Side effect (Drug categories with the similar side effect)	Thrombocytopenia	2	0.00340716	6.74412	0.0361337	1	0.0555
Side effect (Drug categories with the similar side effect)	Thrombophlebitis	2	0.0102564	20.3015	0.004525	1	0.0207
Side effect (Drug categories with the similar side effect)	Thrombosis	1	0.00925926	18.3278	0.0531132	1	0.0712
Side effect (Drug categories with the similar side effect)	Thyroid disorder	1	0.0555556	109.967	0.00905472	1	0.027
Side effect (Drug categories with the similar side effect)	Thyrotoxic crisis	1	0.333333	659.8	0.00151485	1	0.0159
Side effect (Drug categories with the similar side effect)	Tingling sensation	1	0.0103093	20.4062	0.0478352	1	0.0664
Side effect (Drug categories with the similar side effect)	Tinnitus	3	0.0078329	15.5044	0.00103793	0.8978	0.015
Side effect (Drug categories with the similar side effect)	Tongue discolouration	1	0.0166667	32.99	0.0298648	1	0.0491
Side effect (Drug categories with the similar side effect)	Tongue disorder	2	0.020202	39.9879	0.0011984	1	0.0159
Side effect (Drug categories with the similar side effect)	Tongue oedema	2	0.0273973	54.2301	0.00065492	0.5665	0.0136
Side effect (Drug categories with the similar side effect)	Tongue paralysis	1	0.142857	282.771	0.00353107	1	0.0184
Side effect (Drug categories with the similar side effect)	Tooth disorder	1	0.0119048	23.5643	0.0415595	1	0.0608
Side effect (Drug categories with the similar side effect)	Toxic epidermal necrolysis	2	0.00793651	15.7095	0.00742328	1	0.0251
Side effect (Drug categories with the similar side effect)	Tremor	4	0.00873362	17.2873	9.801e-05	0.0848	0.00629
Side effect (Drug categories with the similar side effect)	Tubulointerstitial nephritis	1	0.00900901	17.8324	0.0545476	1	0.0727
Side effect (Drug categories with the similar side effect)	Type IV hypersensitivity reaction	1	0.0714286	141.386	0.00704967	1	0.0241
Side effect (Drug categories with the similar side effect)	Ulcer	1	0.00806452	15.9629	0.0607382	1	0.0784
Side effect (Drug categories with the similar side effect)	Unspecified disorder of skin and subcutaneous tissue	2	0.00347222	6.87292	0.034917	1	0.0542
Side effect (Drug categories with the similar side effect)	Upset stomach	1	0.0119048	23.5643	0.0415595	1	0.0608
Side effect (Drug categories with the similar side effect)	Urethral disorder	2	0.00527704	10.4454	0.0161183	1	0.035
Side effect (Drug categories with the similar side effect)	Urinary retention	3	0.012931	25.5957	0.00024293	0.2101	0.00778
Side effect (Drug categories with the similar side effect)	Urinary tract disorder	2	0.00533333	10.5568	0.0158004	1	0.0349
Side effect (Drug categories with the similar side effect)	Urinary tract infection	1	0.00291545	5.77085	0.159139	1	0.1637
Side effect (Drug categories with the similar side effect)	Urticaria	5	0.00658762	13.0395	4.657e-05	0.0403	0.00504
Side effect (Drug categories with the similar side effect)	Vascular anomaly	1	0.125	247.425	0.00403449	1	0.0196
Side effect (Drug categories with the similar side effect)	Vascular purpura	2	0.0102041	20.198	0.00457012	1	0.0207
Side effect (Drug categories with the similar side effect)	Vasculitis	2	0.0135135	26.7486	0.00264355	1	0.0168
Side effect (Drug categories with the similar side effect)	Vasodilation	1	0.00763359	15.1099	0.0640548	1	0.0811
Side effect (Drug categories with the similar side effect)	Vasodilation procedure	1	0.00763359	15.1099	0.0640548	1	0.0811
Side effect (Drug categories with the similar side effect)	Vasospasm	1	0.025641	50.7538	0.019515	1	0.0386
Side effect (Drug categories with the similar side effect)	Venous thrombosis	1	0.025641	50.7538	0.019515	1	0.0386
Side effect (Drug categories with the similar side effect)	Ventricular extrasystoles	1	0.00793651	15.7095	0.061687	1	0.0793
Side effect (Drug categories with the similar side effect)	Ventricular fibrillation	1	0.00970874	19.2175	0.0507178	1	0.069
Side effect (Drug categories with the similar side effect)	Vertigo	3	0.00616016	12.1934	0.00205559	1	0.0164
Side effect (Drug categories with the similar side effect)	Viral diarrhoea	1	0.0344828	68.2552	0.0145477	1	0.0341
Side effect (Drug categories with the similar side effect)	Viral infection	1	0.008	15.8352	0.0612128	1	0.0788
Side effect (Drug categories with the similar side effect)	Viral upper respiratory tract infection	1	0.0833333	164.95	0.00604563	1	0.0223
Side effect (Drug categories with the similar side effect)	Vision blurred	5	0.0111607	22.0915	3.87e-06	0.00335	0.00167
Side effect (Drug categories with the similar side effect)	Visual disturbance	1	0.00507614	10.0477	0.0947555	1	0.1058
Side effect (Drug categories with the similar side effect)	Visual impairment	3	0.00793651	15.7095	0.00099959	0.8646	0.0149
Side effect (Drug categories with the similar side effect)	Vomiting	4	0.00388727	7.69446	0.00198907	1	0.0164
Side effect (Drug categories with the similar side effect)	Warmth	1	0.030303	59.9818	0.0165377	1	0.0352
Side effect (Drug categories with the similar side effect)	Weight increased	2	0.00645161	12.7703	0.011027	1	0.0295
Side effect (Drug categories with the similar side effect)	Wheezing	2	0.0121212	23.9927	0.00326938	1	0.0184
Side effect (Drug categories with the similar side effect)	White blood cell count increased	1	0.0476191	94.2571	0.0105559	1	0.0289
Side effect (Drug categories with the similar side effect)	Withdrawal symptom	1	0.0217391	43.0304	0.0229771	1	0.0424
Target (Drug categories with the same targets)	5-hydroxytryptamine receptor 1A	1	0.0166667	32.99	0.0298648	1	0.0491
Target (Drug categories with the same targets)	5-hydroxytryptamine receptor 1B	1	0.0285714	56.5543	0.0175311	1	0.0365
Target (Drug categories with the same targets)	5-hydroxytryptamine receptor 2A	1	0.0128205	25.3769	0.0386491	1	0.0581
Target (Drug categories with the same targets)	5-hydroxytryptamine receptor 2B	1	0.0384615	76.1308	0.0130527	1	0.0319
Target (Drug categories with the same targets)	5-hydroxytryptamine receptor 2C	1	0.0204082	40.3959	0.0244572	1	0.0439
Target (Drug categories with the same targets)	5-hydroxytryptamine receptor 3A	1	0.0384615	76.1308	0.0130527	1	0.0319
Target (Drug categories with the same targets)	5-hydroxytryptamine receptor 6	1	0.0555556	109.967	0.00905472	1	0.027
Target (Drug categories with the same targets)	5-hydroxytryptamine receptor 7	1	0.0434783	86.0609	0.0115553	1	0.0302
Target (Drug categories with the same targets)	Alpha-1 adrenergic receptor	1	0.125	247.425	0.00403449	1	0.0196
Target (Drug categories with the same targets)	Alpha-1A adrenergic receptor	1	0.0121951	24.139	0.0405904	1	0.06
Target (Drug categories with the same targets)	Alpha-2 adrenergic receptor	1	0.142857	282.771	0.00353107	1	0.0184
Target (Drug categories with the same targets)	Alpha-2A adrenergic receptor	1	0.0153846	30.4523	0.0323129	1	0.0514
Target (Drug categories with the same targets)	D(1A) dopamine receptor	1	0.0204082	40.3959	0.0244572	1	0.0439
Target (Drug categories with the same targets)	D(2) dopamine receptor	1	0.0113636	22.4932	0.0434949	1	0.0623
Target (Drug categories with the same targets)	D(3) dopamine receptor	1	0.0285714	56.5543	0.0175311	1	0.0365
Target (Drug categories with the same targets)	D(4) dopamine receptor	1	0.0344828	68.2552	0.0145477	1	0.0341
Target (Drug categories with the same targets)	Estrogen sulfotransferase	1	0.25	494.85	0.00201928	1	0.0164
Target (Drug categories with the same targets)	GABA-A receptor (anion channel)	1	0.025	49.485	0.0200103	1	0.0386
Target (Drug categories with the same targets)	Gamma-aminobutyric acid receptor subunit alpha-1	1	0.0175439	34.7263	0.028393	1	0.0479
Target (Drug categories with the same targets)	Glucocorticoid receptor	1	0.0238095	47.1286	0.0210003	1	0.04
Target (Drug categories with the same targets)	Histamine H1 receptor	2	0.0222222	43.9867	0.0009924	0.8584	0.0149
Target (Drug categories with the same targets)	Histamine H4 receptor	1	0.1	197.94	0.00504057	1	0.021
Target (Drug categories with the same targets)	Muscarinic acetylcholine receptor	1	0.2	395.88	0.00252347	1	0.0164
Target (Drug categories with the same targets)	Muscarinic acetylcholine receptor M1	1	0.0123457	24.437	0.0401054	1	0.0596
Target (Drug categories with the same targets)	Prostaglandin G/H synthase 1	1	0.0153846	30.4523	0.0323129	1	0.0514
Target (Drug categories with the same targets)	Prostaglandin G/H synthase 2	1	0.0169491	33.5492	0.0293745	1	0.049
Target (Drug categories with the same targets)	Sodium-dependent dopamine transporter	1	0.0238095	47.1286	0.0210003	1	0.04
Target (Drug categories with the same targets)	Sodium-dependent noradrenaline transporter	1	0.0166667	32.99	0.0298648	1	0.0491
Target (Drug categories with the same targets)	Sodium-dependent serotonin transporter	1	0.0185185	36.6556	0.0269189	1	0.0461
